# Supplementary material for: Breastfeeding and behavioural problems: Propensity score matching with a national cohort of infants in Chile
Source: PubMed Central journal article supplement — BMJ Open. 2019 Feb 15;9(2):e025058. doi: 10.1136/bmjopen-2018-025058 (PMC6398902; doi:10.1136/bmjopen-2018-025058), 2019-02-15
Supplement: bmjopen-2018-025058.draft_revisions.pdf [file bmjopen-2018-025058.draft_revisions.pdf]

# BMJ Open

BMJ Open is committed to open peer review. As part of this commitment we make the peer review history of every article we publish publicly available.

When an article is published we post the peer reviewers' comments and the authors' responses online. We also post the versions of the paper that were used during peer review. These are the versions that the peer review comments apply to.

The versions of the paper that follow are the versions that were submitted during the peer review process. They are not the versions of record or the final published versions. They should not be cited or distributed as the published version of this manuscript.

BMJ Open is an open access journal and the full, final, typeset and author-corrected version of record of the manuscript is available on our site with no access controls, subscription charges or pay-per-view fees (<http://bmjopen.bmj.com>).

If you have any questions on BMJ Open's open peer review process please email [info.bmjopen@bmj.com](mailto:info.bmjopen@bmj.com)

# BMJ Open

## Breastfeeding and behavioural problems: Propensity score matching with a national cohort of infants in Chile

|                               |                                                                                                                                                    |
|-------------------------------|----------------------------------------------------------------------------------------------------------------------------------------------------|
| Journal:                      | <i>BMJ Open</i>                                                                                                                                    |
| Manuscript ID                 | bmjopen-2018-025058                                                                                                                                |
| Article Type:                 | Research                                                                                                                                           |
| Date Submitted by the Author: | 27-Jun-2018                                                                                                                                        |
| Complete List of Authors:     | Lisa-Christine , Girard; University of Edinburgh , Clinical Psychology<br>Farkas, Chamarrita; Pontificia Universidad Catolica de Chile, Psychology |
| Keywords:                     | Breastfeeding, Behaviour Problems, Cohort Study                                                                                                    |
|                               |                                                                                                                                                    |

SCHOLARONE™  
Manuscripts

view only

1 **Breastfeeding and behavioural problems: Propensity score matching with a national cohort of infants**  
2 **in Chile**

3  
4 **Author Listing:** Lisa-Christine Girard, PhD<sup>1</sup>& Chamarrita Farkas, PhD<sup>2</sup>  
5

6 **Affiliations:** 1) School of Health in Social Science, Clinical Psychology, University of Edinburgh 2)  
7 Psychology School, Pontificia Universidad Católica de Chile  
8  
9

10  
11 **\*Corresponding Address to:** Lisa-Christine Girard, PhD. School of Health in Social Science, Clinical  
12 Psychology, University of Edinburgh, Old Medical School, Teviot Place, Edinburgh, EH8 9AG, Email: [Lisa-Christine.Girard@ed.ac.uk](mailto:Lisa-Christine.Girard@ed.ac.uk)  
13  
14

15 **Short title:** Breastfeeding and behaviour  
16

17  
18 **Abbreviations:** Encuesta Longitudinal de la Primera Infancia cohort, ELPI; Propensity Score Matching  
19 PSM; Child Behaviour Checklist CBCL; World Health Organization WHO; Randomized Control Trial RCT;  
20 Attention to Treat ATT  
21

22 **Author Contributions:**

23 Dr. Girard and Prof. Farkas conceptualized the study, carried out the analyses, interpreted the data, drafted  
24 the initial manuscript, critically reviewed and revised the manuscript, and approved the final manuscript as  
25 submitted. All authors approved the final manuscript as submitted and agree to be accountable for all aspects  
26 of the work.  
27  
28

29 **Data Access, Responsibility, and Analysis:** Dr. Girard and Prof. Farkas had full access to all the data in the  
30 study and take responsibility for the integrity of the data and the accuracy of the data analysis.  
31

32 **Conflict of Interest Statement:** The authors have no conflicts of interest relevant to this article to disclose.  
33  
34

35 **Financial Disclosure Statement:** The authors have no financial relationships relevant to this article to  
36 disclose.  
37

38 **Word Count: 3000**  
39

40  
41 *Key words:* Breastfeeding; Behaviour Problems; Propensity Score Matching; Epidemiology; Developmental  
42 Cohort  
43  
44  
45  
46  
47  
48  
49  
50  
51  
52  
53  
54  
55  
56  
57  
58  
59  
60

## Abstract

**Importance:** Potential effects of breastfeeding on children's behaviour remains an elusive debate given inherent methodological challenges. Propensity score matching affords benefits by ensuring greater equivalence on observable social and health determinants, helping to reduce bias between groups.

**Objectives:** We examined whether duration of breastfeeding had an impact on children's externalising and internalising behaviours.

**Study Design:** A cohort study (Encuesta Longitudinal de la Primera Infancia cohort) that included 3,037 Chilean families who were enrolled in 2010. Follow-up data was collected in 2012.

**Setting:** General community.

**Participants:** Population-based sample. Eligibility criteria: children born full-term with complete data on matching variables. Matching variables included: healthcare system as a proxy of income, presence of a partner/spouse in the household, maternal age, educational level, IQ, working status, type of work, diagnosis of prenatal depression by a healthcare professional, smoking during pregnancy, delivery type, child sex, weight at birth, incubation following delivery, and child age.

**Exposure:** Duration of breastfeeding.

**Main Outcomes and Measures:** Externalising and internalising problems assessed using the Child Behaviour Checklist.

**Results:** Matched results revealed benefits of any breastfeeding, up to six months, on emotional reactivity and somatic complaints, (mean difference of -1.05, 95% CI, -0.21 to -1.98 and -1.26, 95% CI, -0.52 to -2.00, respectively). Children breastfed between 7-12 months also had reduced scores on emotional reactivity and somatic complaints, in addition to attention problems (mean difference of -1.05, 95% CI, -0.21 to -1.98; -0.83, 95% CI, -0.11 to -1.55; and -0.52, 95% CI, -0.06 to -0.96, respectively). No benefits were observed for children breastfed 13 months or more.

**Conclusion:** Reduced internalising difficulties and inattention were found in children breastfed up to a year, suggesting that breastfeeding may have beneficial impacts on these areas of development. The magnitude of effect was modest. Extended durations of breastfeeding did not appear to offer any benefits.

### Article Summary:

#### Strengths:

- Use of a quasi-experimental statistical approach to match children with the propensity to be breastfed to those who were not on observable health and social determinates.
- Use of a large Chilean cohort where confounding structure differs from developed countries.
- The inclusion of 14 matching variables including maternal IQ, which is almost double the average amount of variables included in similar studies.

#### Limitations:

- No specific information was collected on full breastfeeding in this cohort restricting the study to examining duration only.
- As a result of the inclusion/exclusion criteria, the sample size was reduced from the entire cohort.

1 A considerable amount of literature supports numerous medical benefits of breastfeeding for children  
2 in reducing for example, the risk of nonspecific gastroenteritis, severe lower respiratory tract infections,  
3 atopic dermatitis, obesity, and high systolic blood pressure.<sup>1-3</sup> However, the benefits of breastfeeding on  
4 children's behavioural outcomes are less clear-cut. Differing hypotheses have been put forth regarding  
5 potential mechanisms for the perceived associations between breastfeeding and behavioural outcomes. For  
6 example, it has been suggested that breastfeeding may lead to reduced behavioural difficulties as a result of  
7 early skin-to-skin contact, when active bonding is present, helping to promote the development of a secure  
8 bond between mother and baby.<sup>(e.g.,4)</sup> This may be particularly salient in protecting against the emergence of  
9 internalising behaviours as children develop.<sup>5</sup> On the other hand, associations between breastfeeding and  
10 behavioural outcomes may be the result of the long-chain polyunsaturated fatty acids (n-3 and n-6 PUFA)  
11 found in breast milk, which arguably impact on brain development and white growth matter; an area of the  
12 brain which is typically underdeveloped in children who display with elevated levels of externalising  
13 behaviours.<sup>6-7</sup> Moreover, deficits in n-3 PUFA in particular, have been shown to increase the risk of neuronal  
14 abnormalities in studies of rats, associated with increased levels of anxiety, depression, aggression,  
15 inattention and hyperactivity.<sup>(e.g.,8-10)</sup> While the mechanisms suggested have differing implications regarding  
16 pathways of potential effects, it is important to first be able to untangle whether 'effects' exist for children's  
17 behavioural outcomes, irrespective of selection and confounding. For example, it may be possible that there  
18 is no direct mechanism through which breastfeeding is implicated in behavioural outcomes, but rather,  
19 associations found may be an artefact of maternal and family-level characteristics.

20 There has been mixed support for associations between breastfeeding and externalising behaviours  
21 such as conduct problems and hyperactivity<sup>(e.g.,11-15)</sup>, and internalising behaviours such as anxiety and  
22 depression<sup>(e.g., 5,16-18)</sup>, in studies from infancy to adulthood. When associations are observed, a duration of  
23 four-to-six months or longer appears to be most common. Systematic differences between studies regarding  
24 definitions of breastfeeding, classification of behaviours, timing of assessment, and statistical approaches for  
25 handling confounding and selection bias, are likely contributing factors accounting for these inconsistencies.  
26 For example, self-selection into breastfeeding has repeatedly been implicated in studies examining  
27 breastfeeding and developmental outcomes. In developed countries in particular, research continues to  
28 demonstrate characteristics common in mothers who breastfeed (e.g., lower engagement in high-risk prenatal  
29 behaviours, higher education, higher income, and older age at child birth<sup>e.g.,19-20</sup>), which are also associated  
30 with behavioural outcomes. If associations between breastfeeding and behavioural difficulties are an artefact  
31 of maternal or family characteristics, differences in statistical approaches for handling selection bias will  
32 have important consequences. Indeed, this is reflected in the literature whereby the greater the number of  
33 implicated confounders are controlled, often, the less likely significant associations remain.<sup>21</sup>

1 On the other hand, using cohorts from developing countries may provide additional insights given the  
2 differing confounding structures.<sup>22</sup> For example, notable differences between developed and developing  
3 countries regarding associated maternal characteristics were recently demonstrated in the lancet series.<sup>20</sup>  
4 More specifically, maternal characteristics common of mothers in developing countries who breastfeed,  
5 particularly for longer durations, included poverty, lower socio-economic-status, and in some cases, lower  
6 maternal education.<sup>23-24</sup> Given this inverse association between socio-economic standing and selection into  
7 breastfeeding, replication of associations between breastfeeding and behavioural problems, may offer  
8 additional advantages in better understanding potential 'effects'. Currently, there are a lack of studies  
9 examining breastfeeding and behavioural outcomes using nationally representative cohorts of infants in  
10 Chile, which provides such a possibility. Additionally, challenges in examining associations between longer  
11 durations of breastfeeding on behavioural outcomes due to low prevalence rates in many developed countries  
12 is common. In Chile, duration of breastfeeding has been steadily increasing over the past decade and was  
13 reported in 2014 at 63% of mothers who were still exclusively breastfeeding when infants were six-months  
14 of age.<sup>25</sup> Taken together, examining breastfeeding duration and behavioural outcomes with a nationally  
15 representative cohort from Chile, may offer additional benefits in our understanding.

## 26 27 28 **Objectives**

29 To examine breastfeeding and children's behavioural outcomes using a quasi-experimental statistical  
30 technique to reduce observable differences between groups, whereby attempting to address inherent  
31 limitations in observational studies. Duration of breastfeeding was examined. Moreover, we examined  
32 whether in using a Chilean cohort, we could replicate the findings of Girard et al.<sup>11-12</sup> regarding reduced  
33 hyperactivity for children breastfed. We extend upon this work by also examining internalising behaviours.  
34 We hypothesised, in line with previous findings and recommendations of the WHO<sup>26</sup>, that children who were  
35 breastfed for a minimum of six-months would present with reduced behavioural problems in early childhood.

## 36 37 38 39 40 41 42 43 44 **Method**

45 Participants included families enrolled in the "Encuesta Longitudinal de la Primera Infancia cohort,  
46 ELPI", recruited in Chile in 2010 and 2012. Families recruited in the second wave (i.e., in 2012) were not  
47 considered in this study given that child outcomes were not available longitudinally. The cohort was initially  
48 recruited to better understand the sociodemographic backgrounds of children and their families alongside  
49 their physical, social, and emotional development over time. The cohort is representative of children born  
50 between January 2006 and August 2009 in urban and rural areas, across all regions of Chile.<sup>27</sup> A total of  
51 15,175 families with children between the ages of seven and 58-months were initially contacted for inclusion.  
52 At wave one, 14,161 families were assessed, 93.3% of the targeted sample. However, 487 children did not  
53  
54  
55  
56  
57  
58  
59

1 have information pertaining to their age and were excluded. Inclusion criteria in this study were children  
2 aged seven to 24-months, who had complete data on all confounders, and who were born full term ( $n=4,375$ ).  
3 Additionally, mothers who were still breastfeeding when behavioural measures were collected and who had  
4 breastfed more than six, but less than 12-months, were excluded ( $n=442$ ), as it was not possible to identify  
5 whether they should be included in the group of children breastfed between seven and 12-months or in the  
6 extended breastfeeding group. This resulted in a possible sample of 3,933 children and their families, 50.6%  
7 of whom were boys ( $n=1,992$ ). However, missing outcome data at wave two in 2012, resulted in a final  
8 sample 3,037. Demographic characteristics of the included children and their families can be found in Table  
9 1. A table comparing the entire cohort to those included can be found in the online supplement. Ethical  
10 approval was obtained from the Universidad de Chile, Centro de Microdatos. Parents/guardians were  
11 provided with oral and written information about the study and informed consent was given with completion  
12 of the first questionnaire.

13 Children's behaviours were assessed using the Child Behaviour Checklist 1½-5 (CBCL)<sup>28</sup>. The  
14 CBCL 1½-5 is a parent report used to identify behaviour problems in children between the ages of one-and-  
15 a-half and five years. It is comprised of 99 items divided into subscales. The seven subscales include:  
16 emotionally reactive (9 items), anxious/depressed (8 items), somatic complaints (11 items), withdrawn (8  
17 items), sleep problems (7 items), attention problems (5 items), and aggression (19 items). Parents rate each  
18 individual behavioural item on 3-point likert scale ranging from 0 (*not true*) to 2 (*very true or often true*),  
19 with higher scores indicative of more problematic behaviour. The CBCL 1½-5 is available in several  
20 languages, including Spanish, and has previously been validated in the literature with Chilean samples.<sup>(e.g., 29)</sup>  
21 The CBCL was collected at wave two, in 2012, when children were between the ages of 32 and 48-months.  
22 Means and standard deviations, along with correlations between subscales are presented in Table 2.

23 Breastfeeding information was collected at wave one, both retrospectively and prospectively, given  
24 the unique sampling approach of recruitment of families with children between the ages of seven and 58  
25 months. Due to potential recall bias and in an attempt to create more homogeneity within mother's duration  
26 of recall, we included only families with children between seven and 24-months. Mothers were asked two  
27 questions: "was the newborn breastfed by his/her biological mother?" and "until what month was the child  
28 breastfed by his/her biological mother?" No information was collected regarding full breastfeeding in the  
29 cohort. Of the sample included, only 140 mothers/caregivers reported that the child had never been breastfed.  
30 Based on the WHO recommendations, we grouped children into one of four categories of duration; never  
31 breastfed ( $n=140$ ), breastfed up to six complete months ( $n = 1,277$ ), breastfed between seven and 12  
32 complete months ( $n=1,234$ ), and breastfed  $\geq 13$  months ( $n = 1,282$ ). Each category of duration was treated as  
33 mutually exclusive, dummy coded, and compared against children who had never been breastfed.



1 Numerous confounders and self-selection into breastfeeding have been argued to account, at least in  
2 part, for previous associations between breastfeeding and behavioural outcomes. In the current study we  
3 matched groups on 13 of the most commonly identified factors, along with children's age given the variation  
4 in this sample. At the family level these included the category of the healthcare system that the family  
5 belonged to (public, private) as a proxy of income, and the presence of a partner/spouse in the household  
6 (yes/no). At the maternal level, these included maternal age ( $\leq 24$  years, 25-29 years, 30-34 years,  $\geq 35$  years),  
7 educational level (no formal education, primary, secondary, vocational training, university training,  
8 postgraduate), maternal IQ (a score of 8 or below on the Wechsler Intelligence Adult Scale, digit and  
9 vocabulary scales; WAIS,<sup>30</sup>), working status (yes/no), type of work (professional/managerial, non-  
10 manual/skilled manual, semi-skilled/unskilled, unknown/never worked), diagnosis of depression by a  
11 healthcare professional during pregnancy (yes/no), smoking during pregnancy (yes/no), and delivery type  
12 (vaginal, caesarean). To note, the WAIS has been adapted in Chile with good reported reliability and  
13 validity.<sup>31-32</sup> At the child level, four confounders were included, namely, child sex (boy/girl), weight at birth  
14 ( $\geq 2500$  grams, yes/no), whether the child was placed in an incubator after delivery (yes/no), and age.

## 26 **Statistical Analysis**

27  
28 Given ethical issues with randomisation, we employed the use of propensity score matching (PSM), a  
29 statistical approach which attempts to ensure equivalence between treatment and control groups (i.e.,  
30 breastfed, not breastfed), by matching groups on the most relevant factors, subsequently reducing selection  
31 bias and confounding. That is, comparisons are made between children who were breastfed and those who  
32 were not based on their measured characteristics and similar propensities for being breastfed. Nearest  
33 neighbour 1:1 models, with replacement were used. In nearest neighbour matching, groups are first randomly  
34 ordered to reduce possible bias in the matching procedure, with matching then occurring sequentially. To  
35 ensure the most optimal matches between pairs on propensity scores, we imposed a caliper of a tenth of a  
36 standard deviation. That is, for a match to occur, the propensity score of a child who was breastfed to a child  
37 who was not, had to fall within a tenth of a standard deviation of one another. Matching with replacement  
38 was necessary given the low rates of children who were never breastfed. While this technique can result in  
39 larger amounts of variance, it has been argued to reduce bias by ensuring matches are of better quality.<sup>33</sup> All  
40 children fell within the area of common support which refers to cases being excluded as a result of not fitting  
41 within the specified caliper. To ensure the overall quality of the matching procedure, balance checks were  
42 conducted on individual confounders and the overall models. For individual factors, remaining bias ranged  
43 between 0.0 and 18.8% and the overall mean remaining bias for models ranged between 5.5% and 7.2%. It  
44 has been suggested that less than 20% remaining bias is indicative of good matching,<sup>34</sup> thus we concluded  
45 that our matching was successful. We report on the average treatment effects of those treated (ATT). All  
46  
47  
48  
49  
50  
51  
52  
53  
54  
55  
56  
57  
58  
59



1 analyses were conducted using Stata v14 software. We use the term significant henceforth to denote  
2 statistical significance.  
3

### 4 **Results**

5  
6 Comparing children never breastfed to those who were breastfed up to six months inclusive,  
7 significant differences in favour of those who were breastfed were found on two of the behavioural subscales  
8 (i.e., emotionally reactive and somatic complaints). These results remained significant following matching  
9 and were in the expected direction whereby children who were breastfed had lower scores on these subscales  
10 (i.e., a mean difference of -1.05 and -1.26, respectively). Comparing children who were never breastfed to  
11 those breastfed between seven and 12 months inclusive, significant differences were found prior to matching  
12 on all subscales with the exception of anxious/depressed and sleep problems. After matching, significant  
13 differences remained for emotional reactivity, somatic complaints, and attention problems (i.e., a mean  
14 difference of -1.05, -0.83 and -0.52, respectively). Once again results were in the expected direction with  
15 reduced difficulties for children who were breastfed. Comparing those never breastfed to the extended group  
16 (i.e., 13 months or more), pre-matching results were similar to the first model with lower scores on the  
17 emotionally reactive and somatic complaints subscales. Post matching revealed no remaining significant  
18 differences between groups. All results can be found in Table 3.  
19  
20  
21  
22  
23  
24  
25  
26  
27  
28  
29

### 30 **Discussion**

31  
32 While causality remains an ongoing debate, owing to the ethical constraints of conducting RCTs, our  
33 results add to the emerging corpus of literature trying to untangle the 'effects' of breastfeeding on  
34 behavioural outcomes by using a PSM approach in a Chilean cohort. Given the knowledge of family and  
35 maternal characteristics commonly observed of children who are breastfed, the use of matching helps to  
36 ensure that differences between groups on these observable characteristics are significantly minimised, so  
37 that the propensity to be breastfed across groups is arguably comparable. As a result, only post-matching  
38 results are discussed. Due to exclusions, our results have implications only for children who were born full  
39 term.  
40  
41  
42  
43  
44

45  
46 The results suggest that breastfeeding may be an effective low-cost early investment for reducing  
47 difficulties with emotional reactivity and somatic complaints, in addition to attention problems experienced  
48 in early childhood; all of which are indicative of neurodevelopmental difficulties. Duration appears to be an  
49 important factor implicated in these associations. For example, results revealed that any breastfeeding during  
50 the first six months, and up to 12 full months, contributed to reductions in children's difficulties with  
51 emotional reactivity and somatic complaints up to four years of age. In comparison, a minimum of at least six  
52 full months or more of breastfeeding was required for observed benefits related to attention problems at the  
53 same age. This latter finding is in line with findings from Girard et al.,<sup>11</sup>, who also used PSM in a nationally  
54  
55  
56  
57  
58  
59

1 representative sample of infants from Ireland. The similar results found around three years of age, across  
2 these two unique cohorts, whilst using PSM, demonstrates favourable support for a direct mechanism  
3 between breastfeeding and reduced attention problems in early childhood, rather than confounding per se.  
4 Worth noting is the link found between inattention/hyperactivity, regulation difficulties and mood  
5 disorders<sup>35</sup>, and their link with deficiencies in arachidonic acid and docosahexaenoic acid.<sup>36</sup> Given the types  
6 of behaviours where reductions for those breastfed are found in this study, and in the context of previous  
7 studies, a plausible hypothesis might be that of the nutrients found in breastmilk contributing to the growing  
8 infant's brain development. More research in this area, using well designed and rigorously sound  
9 methodology is first needed before firm conclusions can be drawn.

10  
11 Conversely, no benefits of extended breastfeeding were found on children's internalising or  
12 externalising behavioural problems. This may suggest a non-linear dose-response effect of breastfeeding on  
13 behaviour, similar to previous findings. (e.g.,<sup>12</sup>) While the recommendations put forth by the WHO for  
14 continued partial breastfeeding up to two years of age or more for the physical health and growth of infants  
15 has been suggested, we observed no additional benefits of extended breastfeeding on behavioural problems in  
16 this sample. These findings do not however contradict these recommendations regarding the many afforded  
17 medical benefits of extended durations of breastfeeding. Of interest and as can be seen in Table 1, mothers  
18 who breastfed for extended durations in Chile had similar characteristics to mothers who had never breastfed.  
19 For example, in both the never- and extended breastfeeding groups, a significantly higher proportion of  
20 mothers had never worked, were in the public tier of the health system, had only completed education at the  
21 primary level and had below average scores on both the digit and vocabulary scales of the WAIS. While a  
22 non-linear dose-response hypothesis is plausible, these findings also likely support what is already known.  
23 Maternal characteristics contribute to children's behavioural outcomes and the nutrients alone found in  
24 breastmilk may be only part of the story. Moreover, it supports the differences in confounding structures of  
25 breastfeeding in developing and developed countries.<sup>20,22</sup>

26  
27 Notable strengths of this study include the use of the largest nationally representative cohort of  
28 Chilean children to date, where self-selection and confounding structures differ from developed countries,  
29 whilst utilising PSM, with a large number of matching confounders to reduce differences across groups, of  
30 which included maternal IQ. Despite these strengths, notable limitations must be mentioned. While  
31 information on necessary supplementation was asked, there was no specific information regarding full  
32 breastfeeding, limiting our ability to examine its impact. This is an important issue given the differences in  
33 feeding experiences and the potential for dilution of effects from breastfeeding to behaviour. In the same  
34 vein, no information regarding direct breastfeeding versus expressed breast milk was collected; information  
35 which may help in better understanding pathways of effect. Due to our inclusion/exclusion criteria, the  
36 sample size was significantly reduced, with some statistically significant differences between the originally

1 recruited cohort and those included in the current study. Additionally, despite the benefits afforded by PSM  
2 techniques, matching is only possible on observable characteristics. While we were able to include a  
3 multitude of health and social confounders, including maternal IQ, it remains possible that unobservable  
4 characteristics contribute to the associations. Finally, shared method variance is a concern given that parent  
5 reports were used to collect information on both breastfeeding duration and child behaviours.  
6  
7

8  
9 Despite these limitations, and in the context of the strengths of this study, we believe these results  
10 contribute important findings, namely more support for the potential of 'causal paths'. While a  
11 comprehensive answer to the question of effects on psychosocial development remains unanswered, with  
12 replication across regions whilst using more stringent methodological approaches to help in reducing bias  
13 inherent in observational studies, promise for better understanding of potential mechanisms is viable.  
14  
15  
16  
17  
18  
19  
20  
21  
22  
23  
24  
25  
26  
27  
28  
29  
30  
31  
32  
33  
34  
35  
36  
37  
38  
39  
40  
41  
42  
43  
44  
45  
46  
47  
48  
49  
50  
51  
52  
53  
54  
55  
56  
57  
58  
59  
60

## References

1. Horta BL, Loret de Mola C, Victora CG. Long-term consequences of breastfeeding on cholesterol, obesity, systolic blood pressure and type 2 diabetes: a systematic review and meta-analysis. *Acta Paediatrica*. 2015 Dec 1;104(S467):30-7.
2. Ip S, Chung M, Raman G, Trikalinos TA, Lau J. A summary of the Agency for Healthcare Research and Quality's evidence report on breastfeeding in developed countries. *Breastfeeding Medicine*. 2009 Oct 1;4(S1):S-17.
3. Taylor, J. S., Kacmar, J. E., Nothnagle, M., & Lawrence, R. A. (2005). A systematic review of the literature associating breastfeeding with type 2 diabetes and gestational diabetes. *Journal of the American College of Nutrition*, 24(5), 320-326. doi:10.1080/07315724.2005.10719480.
4. Britton, J. R., Britton, H. L., & Gronwaldt, V. (2006). Breastfeeding, sensitivity, and attachment. *Pediatrics*, 118(5), e1436-e1443. doi:10.1542/peds.2005-2916.
5. Liu J, Leung P, Yang A. Breastfeeding and active bonding protects against children's internalizing behavior problems. *Nutrients*. 2013 Dec 24;6(1):76-89.
6. Sarkar S, Craig MC, Catani M, Dell'Acqua F, Fahy T, Deeley Q, Murphy DG. Frontotemporal white-matter microstructural abnormalities in adolescents with conduct disorder: a diffusion tensor imaging study. *Psychological Medicine*. 2013 Feb;43(2):401-11.
7. Silk TJ, Vance A, Rinehart N, Bradshaw JL, Cunnington R. White-matter abnormalities in attention deficit hyperactivity disorder: a diffusion tensor imaging study. *Human Brain Mapping*. 2009 Sep 15;30(9):2757-65.
8. DeMar JC, Ma K, Bell JM, Igarashi M, Greenstein D, Rapoport SI. One generation of n-3 polyunsaturated fatty acid deprivation increases depression and aggression test scores in rats. *Journal of Lipid Research*. 2006 Jan 1;47(1):172-80.
9. Fedorova I, Alvheim AR, Hussein N, Salem Jr N. Deficit in prepulse inhibition in mice caused by dietary n-3 fatty acid deficiency. *Behavioral Neuroscience*. 2009 Dec;123(6):1218.
10. Janssen CI, Kiliaan AJ. Long-chain polyunsaturated fatty acids (LCPUFA) from genesis to senescence: the influence of LCPUFA on neural development, aging, and neurodegeneration. *Progress in Lipid Research*. 2014 Jan 31;53:1-7.
11. Girard LC, Doyle O, Tremblay RE. Breastfeeding, cognitive and noncognitive development in early childhood: a population study. *Pediatrics*. 2017 Mar 27:e20161848.
12. Girard LC, Doyle O, Tremblay RE. Breastfeeding and externalising problems: a quasi-experimental design with a national cohort. *European Child & Adolescent Psychiatry*. 2017 Nov 24:1-8.
13. Lind JN, Li R, Perrine CG, Schieve LA. Breastfeeding and later psychosocial development of children at 6 years of age. *Pediatrics*. 2014 Sep 1;134(Supplement 1):S36-41.

14. Belfort MB, Rifas-Shiman SL, Kleinman KP, Bellinger DC, Harris MH, Taveras EM, Gillman MW, Oken E. Infant breastfeeding duration and mid-childhood executive function, behavior, and social-emotional development. *Journal of Developmental and Behavioral Pediatrics: JDBP*. 2016 Jan;37(1):43.
15. Oddy WH, Li J, Robinson M, Whitehouse AJ. The long-term effects of breastfeeding on development. *Contemporary Pediatrics*. 2012. InTech.
16. de Mola CL, Horta BL, Gonçalves H, de Avila Quevedo L, Pinheiro R, Gigante DP, dos Santos Motta JV, Barros FC. Breastfeeding and mental health in adulthood: A birth cohort study in Brazil. *Journal of Affective Disorders*. 2016 Sep 15;202:115-9.
17. Fergusson DM, Woodward LJ. Breast feeding and later psychosocial adjustment. *Paediatric and perinatal epidemiology*. 1999 Apr 1;13(2):144-57.
18. Kwok MK, Leung GM, Schooling CM. Breast feeding and early adolescent behaviour, self-esteem and depression: Hong Kong's 'Children of 1997' birth cohort. *Archives of Disease in Childhood*. 2013 Nov 1;98(11):887-94.
19. Girard LC, Côté SM, de Lauzon-Guillain B, Dubois L, Falissard B, Forhan A, Doyle O, Bernard JY, Heude B, Saurel-Cubizolles MJ, Kaminski M. Factors associated with breastfeeding initiation: a comparison between France and French-speaking Canada. *PLoS One*. 2016 Nov 30;11(11):e0166946.
20. Victora CG, Bahl R, Barros AJ, França GV, Horton S, Krasevec J, Murch S, Sankar MJ, Walker N, Rollins NC. Breastfeeding in the 21st century: epidemiology, mechanisms, and lifelong effect. *The Lancet*. 2016 Feb 5;387(10017):475-90.
21. Walfisch A, Sermer C, Cressman A, Koren G. Breast milk and cognitive development—the role of confounders: a systematic review. *BMJ Open*. 2013 Aug 1;3(8):e003259.
22. Brion MJ, Lawlor DA, Matijasevich A, Horta B, Anselmi L, Araújo CL, Menezes AM, Victora CG, Smith GD. What are the causal effects of breastfeeding on IQ, obesity and blood pressure? Evidence from comparing high-income with middle-income cohorts. *International Journal of Epidemiology*. 2011 Feb 24;40(3):670-80.
23. Lutter CK, Chaparro CM, Grummer-Strawn LM. Increases in breastfeeding in Latin America and the Caribbean: an analysis of equity. *Health Policy and Planning*. 2010 Sep 28;26(3):257-65.
24. Pérez-Escamilla R. Breastfeeding and the nutritional transition in the Latin American and Caribbean Region: a success story? *Cadernos de Saude Publica*. 2003 Jan;19:S119-27.
25. UNICEF. Estado mundial de la infancia 2014 en cifras [World state of infancy 2014 in numbers]. 2014. Retrieved from <https://www.unicef.org/spanish/sowc2014/numbers/>, 05 February 2018.
26. World Health Organization, & UNICEF. Global strategy for infant and young child feeding. *Geneva, Switzerland: World Health Organization Press*. 2003.
27. Bravo D. Encuesta Longitudinal de la Primera Infancia. Centro Micro Datos Departamento Economía Universidad de Chile[Links]. 2012.

- 1 28. Achenbach, T.M., & Rescorla, L.A. Manual for the ASEBA School-Age Forms & Profiles.  
2 Burlington, VT: University of Vermont, Research Center for Children, Youth, & Families. 2001.  
3
- 4 29. Ivanova MY, Achenbach TM, Rescorla LA, Harder VS, Ang RP, Bilenberg N, Bjarnadottir G,  
5 Capron C, De Pauw SS, Dias P, Dobrean A. Preschool psychopathology reported by parents in 23  
6 societies: testing the seven-syndrome model of the child behavior checklist for ages 1.5–5. *Journal of*  
7 *the American Academy of Child & Adolescent Psychiatry*. 2010 Dec 1;49(12):1215-24.  
8
- 9 30. Wechsler, D. The measurement of adult intelligence. Baltimore, MD: William and Wilkins. 1939.  
10
- 11 31. Berdicewski O, Herreros R. Normas de adaptación WAIS a Chile (Doctoral dissertation, Tesis de  
12 Grado no publicada), Universidad de Chile, Santiago, Chile. 1960.  
13
- 14 32. Hermosilla, M. La Escala de Inteligencia de Wechsler para adultos [Wechsler intelligence scale for  
15 adults] (unpublished manuscript). Escuela de Psicología, Pontificia Universidad Católica de Chile,  
16 Santiago, Chile. 1982.  
17
- 18 33. Caliendo M, Kopeinig S. Some practical guidance for the implementation of propensity score  
19 matching. *Journal of Economic Surveys*. 2008 Feb 1;22(1):31-72.  
20
- 21 34. Rosenbaum PR, Rubin DB. The bias due to incomplete matching. *Biometrics*. 1985;41(1):103–116.  
22
- 23 35. Hirshfeld-Becker DR, Biederman J, Faraone SV, Violette H, Wrightsman J, Rosenbaum JF.  
24 Temperamental correlates of disruptive behavior disorders in young children: preliminary findings.  
25 *Biological Psychiatry*. 2002 Apr 1;51(7):563-74.  
26
- 27 36. Richardson AJ. Omega-3 fatty acids in ADHD and related neurodevelopmental disorders.  
28 *International Review of Psychiatry*. 2006 Jan 1;18(2):155-72.  
29  
30  
31  
32  
33  
34  
35  
36  
37  
38  
39  
40  
41  
42  
43  
44  
45  
46  
47  
48  
49  
50  
51  
52  
53  
54  
55  
56  
57  
58  
59  
60



**Table 1:** Family, maternal, infant, and medical characteristics: Infant cohort between 7 and 24 months

|                                                   | Never<br>breastfeed<br>(n=140) | 1-6 months<br>(n=1277) | 7-12 months<br>(n=1234) | 13 months or<br>more<br>(n=1282) | <i>p</i>  |
|---------------------------------------------------|--------------------------------|------------------------|-------------------------|----------------------------------|-----------|
| <b>Resident spouse/partner (yes)</b>              | 90 (64.3)                      | 851 (66.6)             | 859 (69.6)              | 891 (69.5)                       | <i>ns</i> |
| <b>Social class</b>                               |                                | <b>n (%)</b>           | <b>n (%)</b>            | <b>n (%)</b>                     | ≤ .001    |
| Professional/managerial                           | 8 (5.7)                        | 111 (8.7)              | 98 (7.9)                | 116 (9.0)                        |           |
| Non-manual/skilled manual                         | 50 (35.7)                      | 512 (40.1)             | 487 (39.5)              | 355 (27.7)                       |           |
| Semiskilled/unskilled                             | 5 (3.6)                        | 33 (2.6)               | 23 (1.9)                | 34 (2.7)                         |           |
| Never worked                                      | 77 (55.0)                      | 621 (48.6)             | 626 (50.7)              | 777 (60.6)                       |           |
| <b>Health provisional system</b>                  |                                |                        |                         |                                  | ≤ .001    |
| Public system                                     | 127 (90.7)                     | 1107 (86.7)            | 1069 (86.6)             | 1205 (94.0)                      |           |
| Private system                                    | 13 (9.3)                       | 170 (13.3)             | 165 (13.4)              | 77 (6.0)                         |           |
| <b>Maternal education</b>                         |                                |                        |                         |                                  | ≤ .001    |
| No formal education                               | 0 (0)                          | 3 (0.2)                | 4 (0.3)                 | 7 (0.5)                          |           |
| Primary complete                                  | 26 (18.6)                      | 155 (12.1)             | 154 (12.5)              | 279 (21.8)                       |           |
| Secondary complete                                | 59 (42.1)                      | 491 (38.4)             | 483 (39.1)              | 544 (42.4)                       |           |
| Vocational training                               | 42 (30.0)                      | 441 (34.5)             | 392 (31.8)              | 347 (27.1)                       |           |
| University training                               | 13 (9.3)                       | 163 (12.8)             | 176 (14.3)              | 86 (6.7)                         |           |
| Postgraduates studies                             | 0 (0)                          | 13 (1.0)               | 17 (1.4)                | 7 (0.5)                          |           |
| Unknown                                           | 0 (0)                          | 11 (0.9)               | 8 (0.6)                 | 12 (0.9)                         |           |
| <b>Maternal working status (yes)</b>              | 51 (36.4)                      | 533 (41.7)             | 505 (40.9)              | 407 (31.7)                       | ≤ .001    |
| <b>Maternal age</b>                               |                                |                        |                         |                                  | ≤ .001    |
| ≤ 24                                              | 66 (47.1)                      | 524 (41.0)             | 425 (34.4)              | 485 (37.8)                       |           |
| 25-29                                             | 21 (15.0)                      | 294 (23.0)             | 311 (25.2)              | 258 (20.1)                       |           |
| 30-34                                             | 27 (19.3)                      | 239 (18.7)             | 284 (23.0)              | 265 (20.7)                       |           |
| ≥ 35                                              | 26 (18.6)                      | 220 (17.2)             | 214 (17.3)              | 274 (21.4)                       |           |
| <b>Maternal IQ</b>                                |                                |                        |                         |                                  |           |
| WAIS digit (below average)                        | 103 (73.6)                     | 825 (64.6)             | 768 (62.2)              | 918 (71.6)                       | ≤ .001    |
| WAIS vocabulary (below average)                   | 73 (52.1)                      | 534 (41.8)             | 502 (40.7)              | 671 (52.3)                       | ≤ .001    |
| <b>Maternal depression during pregnancy (yes)</b> | 23 (16.4)                      | 178 (13.9)             | 185 (15.0)              | 188 (14.7)                       | <i>ns</i> |
| <b>Smoking during pregnancy (yes)</b>             | 19 (13.6)                      | 141 (11.0)             | 101 (8.2)               | 151 (11.8)                       | .011      |
| <b>Alcohol use during pregnancy (yes)</b>         | 14 (10.0)                      | 96 (7.5)               | 77 (6.2)                | 96 (7.5)                         | <i>ns</i> |
| <b>Drugs use during pregnancy (yes)</b>           | 4 (2.9)                        | 7 (0.5)                | 8 (0.6)                 | 10 (0.8)                         | .025      |
| <b>Delivery mode (caesarean)</b>                  | 72 (51.4)                      | 606 (47.5)             | 578 (46.8)              | 503 (39.2)                       | ≤ .001    |
| <b>Birth weight (≥2500g, yes)</b>                 | 11 (7.9)                       | 34 (2.7)               | 30 (2.4)                | 28 (2.2)                         | .001      |
| <b>Stay in incubator (yes)</b>                    | 12 (8.6)                       | 46 (3.6)               | 44 (3.6)                | 49 (3.8)                         | .030      |
| <b>Infant sex (boy)</b>                           | 67 (47.9)                      | 658 (51.5)             | 637 (51.6)              | 630 (49.1)                       | <i>ns</i> |

Note: The health provisional system was used as a proxy for the financial status of the family, whereby families in the private system are generally of higher income. Maternal IQ was assessed using both the digit and vocabulary scales of the Wechsler Intelligence Adult Scale, WAIS (Wechsler, 1939). A below average score is defined as a score of 8 or below on the digit and vocabulary scales.

**Table 2:** Bivariate Correlations and Means (Standard Deviations) of Children's Behaviours

|                      | Emotionally<br>reactive | Anxious/<br>depressed | Somatic<br>complaints | Withdrawn | Sleep<br>problems | Attention<br>problems | Aggressive |
|----------------------|-------------------------|-----------------------|-----------------------|-----------|-------------------|-----------------------|------------|
| Emotionally reactive |                         |                       |                       |           |                   |                       |            |
| Anxious/depressed    | .650**                  |                       |                       |           |                   |                       |            |
| Somatic complaints   | .549**                  | .499**                |                       |           |                   |                       |            |
| Withdrawn            | .569**                  | .548**                | .435**                |           |                   |                       |            |
| Sleep problems       | .445**                  | .404**                | .373**                | .350**    |                   |                       |            |
| Attention problems   | .428**                  | .374**                | .319**                | .345**    | .341**            |                       |            |
| Aggressive           | .664**                  | .542**                | .409**                | .496**    | .477**            | .619**                |            |
| Mean                 | 3.11                    | 4.33                  | 3.10                  | 2.92      | 2.83              | 3.72                  | 13.68      |
| Standard deviation   | 2.94                    | 3.01                  | 2.63                  | 2.38      | 2.62              | 1.97                  | 8.35       |

Note: \*\* denotes statistical significance at the 0.01 level



**Table 3: Breastfeeding and Children's Behavioural Problems: Pre and Post Matching Results**

| Up to 6 months                 | Pre Matching |       |                 |      | Post Matching |       |                |      |
|--------------------------------|--------------|-------|-----------------|------|---------------|-------|----------------|------|
|                                | T            | C     | Diff (Sig.)     | S.E  | T             | C     | Diff (Sig.)    | S.E  |
| Emotionally reactive           | 3.16         | 3.98  | <b>-0.81**</b>  | 0.30 | 3.16          | 4.22  | <b>-1.05*</b>  | 0.43 |
| Anxious/depressed              | 4.38         | 4.67  | -0.29           | 0.29 | 4.38          | 4.28  | -0.09          | 0.39 |
| Somatic complaints             | 3.09         | 3.73  | <b>-0.64*</b>   | 0.25 | 3.09          | 4.35  | <b>-1.26**</b> | 0.38 |
| Withdrawn                      | 3.00         | 3.16  | -0.15           | 0.24 | 3.00          | 3.20  | -0.20          | 0.30 |
| Sleep problems                 | 2.86         | 3.07  | -0.20           | 0.26 | 2.86          | 3.21  | -0.35          | 0.35 |
| Attention problems             | 3.79         | 4.05  | -0.26           | 0.19 | 3.79          | 4.04  | -0.25          | 0.22 |
| Aggression                     | 13.91        | 14.90 | -0.98           | 0.85 | 13.91         | 14.52 | -0.61          | 1.17 |
| <b>Between 7 and 12 months</b> |              |       |                 |      |               |       |                |      |
| Emotionally reactive           | 2.85         | 3.98  | <b>-1.12***</b> | 0.29 | 2.85          | 3.91  | <b>-1.05**</b> | 0.43 |
| Anxious/depressed              | 4.12         | 4.67  | -0.54           | 0.30 | 4.12          | 4.36  | -0.23          | 0.38 |
| Somatic complaints             | 2.95         | 3.73  | <b>-0.78**</b>  | 0.26 | 2.95          | 3.78  | <b>-0.83*</b>  | 0.37 |
| Withdrawn                      | 2.70         | 3.16  | <b>-0.45*</b>   | 0.22 | 2.70          | 3.12  | -0.41          | 0.29 |
| Sleep problems                 | 2.68         | 3.07  | -0.38           | 0.26 | 2.68          | 3.05  | -0.37          | 0.36 |
| Attention problems             | 3.57         | 4.05  | <b>-0.48*</b>   | 0.19 | 3.57          | 4.09  | <b>-0.51*</b>  | 0.23 |
| Aggression                     | 13.02        | 14.90 | <b>-1.87*</b>   | 0.81 | 13.02         | 14.83 | -1.81          | 1.21 |
| <b>13 months or more</b>       |              |       |                 |      |               |       |                |      |
| Emotionally reactive           | 3.20         | 3.98  | <b>-0.77*</b>   | 0.30 | 3.20          | 3.57  | -0.37          | 0.45 |
| Anxious/depressed              | 4.42         | 4.67  | -0.24           | 0.31 | 4.42          | 4.42  | 0.00           | 0.43 |
| Somatic complaints             | 3.18         | 3.73  | <b>-0.55*</b>   | 0.27 | 3.18          | 3.83  | -0.65          | 0.41 |
| Withdrawn                      | 3.01         | 3.16  | -0.15           | 0.24 | 3.01          | 2.86  | 0.15           | 0.32 |
| Sleep problems                 | 2.92         | 3.07  | -0.15           | 0.27 | 2.92          | 2.62  | 0.29           | 0.39 |
| Attention problems             | 3.76         | 4.05  | -0.29           | 0.20 | 3.76          | 3.89  | -0.13          | 0.24 |
| Aggression                     | 13.91        | 14.90 | -0.98           | 0.86 | 13.91         | 12.88 | 1.02           | 1.33 |

Note: \*\*\* denotes significance at the  $p = < .001$  level, \*\* at the .01 level, \* at the .05 level. T denotes 'treatment' (breastfed) and C denotes 'control' (not breastfed). 'Diff' represents the difference in scores between groups. S.E. refers to the standard errors. For being breastfed up to 6 months: N for the treatment group was 949 and 110 for the control group. For being breastfed between 7 and 12 months: N for the treatment group was 946 and 110 for the control group. For being breastfed 13 months or more: N for the treatment group was 1,006 and 110 for the control group.

## Online Supplement 1

*Family, maternal, infant, and medical characteristics: A comparison between the Entire and Included Cohort*

|                                            | <b>Entire Cohort<br/>N = 14,161 (%)</b> | <b>Included Families<br/>N = 3,933 (%)</b> | <b>p</b>  |
|--------------------------------------------|-----------------------------------------|--------------------------------------------|-----------|
| Resident spouse/partner (yes)              | 6,873 (69.2%)                           | 2,691 (68.4%)                              | <i>ns</i> |
| Social class                               |                                         |                                            | ≤ .001    |
| Professional/managerial                    | 968 (9.7%)                              | 333 (8.5%)                                 |           |
| Non-manual/skilled manual                  | 3,812 (38.4%)                           | 1,404 (35.7%)                              |           |
| Semi-skilled/unskilled                     | 374 (3.8%)                              | 95 (2.4%)                                  |           |
| Never worked                               | 4,779 (48.1%)                           | 2,101 (53.4%)                              |           |
| Health provisional system                  |                                         |                                            | <i>ns</i> |
| Public system                              | 8,820 (88.8%)                           | 3,508 (89.2%)                              |           |
| Private system                             | 1,113 (11.2%)                           | 425 (10.8%)                                |           |
| Maternal education                         |                                         |                                            | <i>ns</i> |
| No formal education                        | 37 (0.4%)                               | 14 (0.4%)                                  |           |
| Primary complete                           | 1,743 (17.7%)                           | 614 (15.7%)                                |           |
| Secondary Complete                         | 3,917 (39.8%)                           | 1,577 (40.4%)                              |           |
| Vocational training                        | 2,984 (30.3%)                           | 1,222 (31.3%)                              |           |
| University training                        | 1,075 (10.9%)                           | 438 (11.2%)                                |           |
| Postgraduate studies                       | 81 (0.8%)                               | 37 (0.9%)                                  |           |
| Maternal working status (yes)              | 4,366 (44.0%)                           | 1,496 (38.0%)                              | ≤ .001    |
| Maternal age                               |                                         |                                            | ≤ .001    |
| ≤ 24                                       | 2,806 (28.2%)                           | 1,500 (38.1%)                              |           |
| 25-29                                      | 2,250 (22.7%)                           | 884 (22.5%)                                |           |
| 30-34                                      | 2,173 (21.9%)                           | 815 (20.7%)                                |           |
| ≥ 35                                       | 2,704 (27.2%)                           | 734 (18.7%)                                |           |
| Maternal depression during pregnancy (yes) | 1,027 (10.3%)                           | 574 (14.6%)                                | ≤ .001    |
| Smoking during pregnancy (yes)             | 978 (9.9%)                              | 412 (10.5%)                                | <i>ns</i> |
| Alcohol use during pregnancy (yes)         | 705 (7.1%)                              | 283 (7.2%)                                 | <i>ns</i> |
| Drug use during pregnancy (yes)            | 81 (0.8%)                               | 29 (0.7%)                                  | <i>ns</i> |
| Delivery mode (caesarean)                  | 4,314 (43.5%)                           | 1,759 (44.7%)                              | <i>ns</i> |
| Birth weight (≥ 2500g, yes)                | 205 (2.3%)                              | 103 (2.6%)                                 | <i>ns</i> |
| Stay in incubator (yes)                    | 433 (4.4%)                              | 151 (3.8%)                                 | <i>ns</i> |
| Infant sex (boy)                           | 5,004 (50.4%)                           | 1,992 (50.6%)                              | <i>ns</i> |

# BMJ Open

## Breastfeeding and behavioural problems: Propensity score matching with a national cohort of infants in Chile

|                                 |                                                                                                                                                 |
|---------------------------------|-------------------------------------------------------------------------------------------------------------------------------------------------|
| Journal:                        | <i>BMJ Open</i>                                                                                                                                 |
| Manuscript ID                   | bmjopen-2018-025058.R1                                                                                                                          |
| Article Type:                   | Research                                                                                                                                        |
| Date Submitted by the Author:   | 03-Oct-2018                                                                                                                                     |
| Complete List of Authors:       | Lisa-Christine , Girard; University of Edinburgh , Clinical Psychology Farkas, Chamarrita; Pontificia Universidad Catolica de Chile, Psychology |
| <b>Primary Subject Heading</b>: | Epidemiology                                                                                                                                    |
| Secondary Subject Heading:      | Paediatrics, Nutrition and metabolism                                                                                                           |
| Keywords:                       | Breastfeeding, Behaviour Problems, Cohort Study                                                                                                 |
|                                 |                                                                                                                                                 |

SCHOLARONE™  
Manuscripts

1 **Breastfeeding and behavioural problems: Propensity score matching with a national cohort of infants**  
2 **in Chile**

3  
4 **Author Listing:** Lisa-Christine Girard, PhD<sup>1</sup>& Chamarrita Farkas, PhD<sup>2</sup>

5  
6 **Affiliations:** 1) School of Health in Social Science, Clinical Psychology, University of Edinburgh 2)  
7 Psychology School, Pontificia Universidad Católica de Chile

8  
9  
10  
11 **\*Corresponding Address to:** Lisa-Christine Girard, PhD. School of Health in Social Science, Clinical  
12 Psychology, University of Edinburgh, Old Medical School, Teviot Place, Edinburgh, EH8 9AG, Email: [Lisa-Christine.Girard@ed.ac.uk](mailto:Lisa-Christine.Girard@ed.ac.uk)

13  
14  
15 **Short title:** Breastfeeding and behaviour

16  
17  
18 **Abbreviations:** Encuesta Longitudinal de la Primera Infancia cohort, ELPI; Propensity Score Matching  
19 PSM; Child Behaviour Checklist CBCL; World Health Organization WHO; Randomized Control Trial RCT;  
20 Attention to Treat ATT

21  
22  
23 **Author Contributions:**

24 Dr. Girard and Prof. Farkas conceptualized the study, carried out the analyses, interpreted the data, drafted  
25 the initial manuscript, critically reviewed and revised the manuscript, and approved the final manuscript as  
26 submitted. All authors approved the final manuscript as submitted and agree to be accountable for all aspects  
27 of the work.

28  
29 **Data Access, Responsibility, and Analysis:** Dr. Girard and Prof. Farkas had full access to all the data in the  
30 study and take responsibility for the integrity of the data and the accuracy of the data analysis.

31  
32  
33 **Data Sharing Statement:**

34 Data is not able to be deposited in an open repository however researchers wishing to access the data may do  
35 so directly by writing a request to the Centro de Microdatos de la Facultad de Economía y Negocios de la  
36 Universidad de Chile.

37  
38  
39  
40 **Conflict of Interest Statement:** The authors have no conflicts of interest relevant to this article to disclose.

41  
42 **Financial Disclosure Statement:** The authors have no financial relationships relevant to this article to  
43 disclose.

44  
45 **Word Count: 3000**

46  
47  
48 *Key words:* Breastfeeding; Behaviour Problems; Propensity Score Matching; Epidemiology; Developmental  
49 Cohort

## Abstract

**Importance:** Potential effects of breastfeeding on children's behaviour remains an elusive debate given inherent methodological challenges. Propensity score matching affords benefits by ensuring greater equivalence on observable social and health determinants, helping to reduce bias between groups.

**Objectives:** We examined whether duration of breastfeeding had an impact on children's externalising and internalising behaviours.

**Study Design:** A cohort study (Encuesta Longitudinal de la Primera Infancia cohort) that included 3,037 Chilean families who were enrolled in 2010. Follow-up data was collected in 2012.

**Setting:** General community.

**Participants:** Population-based sample. Eligibility criteria: children born full-term with complete data on matching variables. Matching variables included: healthcare system as a proxy of income, presence of a partner/spouse in the household, maternal age, educational level, IQ, working status, type of work, diagnosis of prenatal depression by a healthcare professional, smoking during pregnancy, delivery type, child sex, weight at birth, incubation following delivery, and child age.

**Exposure:** Duration of breastfeeding.

**Main Outcomes and Measures:** Externalising and internalising problems assessed using the Child Behaviour Checklist.

**Results:** Matched results revealed benefits of any breastfeeding, up to six months, on emotional reactivity and somatic complaints, (mean difference of -1.00, 95% CI, -1.84 to -0.16 and -1.02, 95% CI, -1.76 to -0.28, respectively). Children breastfed between 7-12 months also had reduced scores on emotional reactivity, in addition to attention problems (mean difference of -0.86, 95% CI, -1.66 to -0.06 and -0.50, 95% CI, -0.93 to -0.07, respectively). No benefits were observed for children breastfed 13 months or more.

**Conclusion:** Reduced internalising difficulties and inattention were found in children breastfed up to a year, suggesting that breastfeeding may have beneficial impacts on these areas of development. The magnitude of effect was modest. Extended durations of breastfeeding did not appear to offer any benefits.

### Article Summary:

#### Strengths:

- Use of a quasi-experimental statistical approach to match children with the propensity to be breastfed to those who were not on observable health and social determinates.
- Use of a large Chilean cohort where confounding structure differs from developed countries.
- The inclusion of 14 matching variables including maternal IQ, which is almost double the average amount of variables included in similar studies.

#### Limitations:

- No specific information was collected on full breastfeeding in this cohort restricting the study to examining duration only.
- As a result of the inclusion/exclusion criteria, the sample size was reduced from the entire cohort.

## Introduction

A considerable amount of literature supports numerous medical benefits of breastfeeding for children in reducing for example, the risk of nonspecific gastroenteritis, severe lower respiratory tract infections, atopic dermatitis, obesity, and high systolic blood pressure.<sup>1-3</sup> However, the benefits of breastfeeding on children's behavioural outcomes are less clear-cut. Differing hypotheses have been put forth regarding potential mechanisms for the perceived associations between breastfeeding and behavioural outcomes. For example, it has been suggested that breastfeeding may lead to reduced behavioural difficulties as a result of early skin-to-skin contact, when active bonding is present, helping to promote the development of a secure bond between mother and baby.<sup>(e.g.,4)</sup> This may be particularly salient in protecting against the emergence of internalising behaviours as children develop.<sup>5</sup> On the other hand, associations between breastfeeding and behavioural outcomes may be the result of the long-chain polyunsaturated fatty acids (n-3 and n-6 PUFA) found in breast milk, which arguably impact on brain development and white growth matter; an area of the brain which is typically underdeveloped in children who display with elevated levels of externalising behaviours.<sup>6-7</sup> Moreover, deficits in n-3 PUFA in particular, have been shown to increase the risk of neuronal abnormalities in studies of rats, associated with increased levels of anxiety, depression, aggression, inattention and hyperactivity.<sup>(e.g.,8-10)</sup> While the mechanisms suggested have differing implications regarding pathways of potential effects, it is important to first be able to untangle whether 'effects' exist for children's behavioural outcomes, irrespective of selection and confounding. For example, it may be possible that there is no direct mechanism through which breastfeeding is implicated in behavioural outcomes, but rather, associations found may be an artefact of maternal and family-level characteristics.

There has been mixed support for associations between breastfeeding and externalising behaviours such as conduct problems and hyperactivity<sup>(e.g.,11-15)</sup>, and internalising behaviours such as anxiety and depression<sup>(e.g., 5,16-18)</sup>, in studies from infancy to adulthood. When associations are observed, a duration of four-to-six months or longer appears to be most common. Systematic differences between studies regarding definitions of breastfeeding, classification of behaviours, timing of assessment, and statistical approaches for handling confounding and selection bias, are likely contributing factors accounting for these inconsistencies. For example, self-selection into breastfeeding has repeatedly been implicated in studies examining breastfeeding and developmental outcomes. In developed countries in particular, research continues to demonstrate characteristics common in mothers who breastfeed (e.g., lower engagement in high-risk prenatal behaviours, higher education, higher income, and older age at child birth<sup>e.g.,19-20</sup>), which are also associated with behavioural outcomes. If associations between breastfeeding and behavioural difficulties are an artefact of maternal or family characteristics, differences in statistical approaches for handling selection bias will have important consequences. Indeed, this is reflected in the literature whereby the greater the number of implicated confounders are controlled, often, the less likely significant associations remain.<sup>21</sup>

1 On the other hand, using cohorts from developing countries may provide additional insights given the  
2 differing confounding structures.<sup>22</sup> For example, notable differences between developed and developing  
3 countries regarding associated maternal characteristics were recently demonstrated in the Lancet series.<sup>20</sup>  
4 More specifically, maternal characteristics common of mothers in developing countries who breastfeed,  
5 particularly for longer durations, included poverty, lower socio-economic-status, and in some cases, lower  
6 maternal education.<sup>23-24</sup> Given this inverse association between socio-economic standing and selection into  
7 breastfeeding, replication of associations between breastfeeding and behavioural problems, may offer  
8 additional advantages in better understanding potential 'effects'. Currently, there are a lack of studies  
9 examining breastfeeding and behavioural outcomes using nationally representative cohorts of infants in  
10 Chile, which provides such a possibility. While economic growth has been observed, social inequalities in  
11 Chile remain high, particularly for women<sup>25</sup>. Additionally, challenges in examining associations between  
12 longer durations of breastfeeding on behavioural outcomes due to low prevalence rates in many developed  
13 countries is common. In Chile, duration of breastfeeding has been steadily increasing over the past decade  
14 and was reported in 2014 at 63% of mothers who were still exclusively breastfeeding when infants were six-  
15 months of age.<sup>26</sup> Taken together, examining breastfeeding duration and behavioural outcomes with a  
16 nationally representative cohort from Chile, may offer additional benefits in our understanding.  
17  
18  
19  
20  
21  
22  
23  
24  
25  
26  
27  
28  
29

## 30 Objectives

31 To examine breastfeeding and children's behavioural outcomes longitudinally, using a quasi-  
32 experimental statistical technique to reduce observable differences between groups, whereby attempting to  
33 address inherent limitations in observational studies. Duration of breastfeeding was examined. Moreover, we  
34 examined whether in using a Chilean cohort, we could replicate the findings of Girard et al.<sup>11-12</sup> regarding  
35 reduced hyperactivity for children breastfed, following propensity score matching, in two separate  
36 longitudinal Irish cohorts. We extend upon this work by also examining internalising behaviours. We  
37 hypothesised, in line with previous findings and recommendations of the WHO<sup>27</sup>, that children who were  
38 breastfed for a minimum of six-months would present with reduced behavioural problems in early childhood.  
39  
40  
41  
42  
43  
44  
45  
46  
47

## 48 Method

49 Participants included families enrolled in the "Encuesta Longitudinal de la Primera Infancia cohort,  
50 ELPI", recruited in Chile in 2010 and 2012. Families recruited in the second wave (i.e., in 2012) were not  
51 considered in this study given that child outcomes were not available longitudinally. The cohort was initially  
52 recruited to better understand the sociodemographic backgrounds of children and their families alongside  
53 their physical, social, and emotional development over time. The cohort is representative of children born  
54 between January 2006 and August 2009 in urban and rural areas, across all regions of Chile.<sup>28</sup> A total of  
55  
56  
57  
58  
59



15,175 families with children between the ages of seven and 58-months were initially contacted for inclusion. At wave one, 14,161 families were assessed, 93.3% of the targeted sample. However, 487 children did not have information pertaining to their age and were excluded. Inclusion criteria in this study were children aged seven to 24-months, who had complete data on all confounders at wave one, and who were born full term ( $n=4,375$ ). Additionally, mothers who were still breastfeeding at wave one who had breastfed more than six, but less than 12-months, were excluded ( $n=442$ ), as it was not possible to identify whether they should be included in the group of children breastfed between seven and 12-months or in the extended breastfeeding group. This resulted in a possible sample of 3,933 children and their families, 50.6% of whom were boys ( $n=1,992$ ) at wave one. However, missing outcome data (i.e., child behaviours) at wave two in 2012, resulted in a final sample 3,037. Demographic characteristics of the included children and their families can be found in Table 1. A table comparing the entire cohort to those included can be found in the online supplement. Ethical approval was obtained from the Universidad de Chile, Centro de Microdatos. Parents/guardians were provided with oral and written information about the study and informed consent was given with completion of the first questionnaire.

Children's behaviours were assessed using the Child Behaviour Checklist 1½-5 (CBCL)<sup>29</sup>. The CBCL 1½-5 is a parent report used to identify behaviour problems in children between the ages of one-and-a-half and five years. It is comprised of 99 items divided into subscales. The seven subscales include: emotionally reactive (9 items), anxious/depressed (8 items), somatic complaints (11 items), withdrawn (8 items), sleep problems (7 items), attention problems (5 items), and aggression (19 items). Parents rate each individual behavioural item on 3-point Likert scale ranging from 0 (*not true*) to 2 (*very true or often true*), with higher scores indicative of more problematic behaviour. The CBCL 1½-5 is available in several languages, including Spanish, and has previously been validated in the literature with Chilean samples.<sup>(e.g., 30)</sup> The CBCL was collected at wave two, in 2012, when children were between the ages of 32 and 48-months. Means and standard deviations, along with correlations between subscales are presented in Table 2.

Breastfeeding information was collected at wave one, both retrospectively and prospectively, given the unique sampling approach of recruitment of families with children between the ages of seven and 58 months. Due to potential recall bias and in an attempt to create more homogeneity within mother's duration of recall, we included only families with children between seven and 24-months. Mothers were asked two questions: "was the newborn breastfed by his/her biological mother?" and "until what month was the child breastfed by his/her biological mother?" No information was collected regarding full breastfeeding in the cohort. Of the sample included, only 140 mothers/caregivers reported that the child had never been breastfed. Based on the WHO recommendations, we grouped children into one of four categories of duration; never breastfed ( $n=140$ ), breastfed up to six complete months ( $n = 1,277$ ), breastfed between seven and 12

complete months ( $n=1,234$ ), and breastfed  $\geq 13$  months ( $n = 1,282$ ). Each category of duration was treated as mutually exclusive, dummy coded, and compared against children who had never been breastfed.

Numerous confounders and self-selection into breastfeeding have been argued to account, at least in part, for previous associations between breastfeeding and behavioural outcomes. In the current study we matched groups on 13 of the most commonly identified factors, along with children's age given the variation in this sample. At the family level these included the category of the healthcare system that the family belonged to (public, private) as a proxy of income, and the presence of a partner/spouse in the household (yes/no). At the maternal level, these included maternal age, educational level (no formal education, primary, secondary, vocational training, university training, postgraduate), maternal IQ (a score of 8 or below on the Wechsler Intelligence Adult Scale, digit and vocabulary scales; WAIS,<sup>31</sup>), working status (yes/no), type of work (professional/managerial, non-manual/skilled manual, semi-skilled/unskilled, unknown/never worked), diagnosis of depression by a healthcare professional during pregnancy (yes/no), smoking during pregnancy (yes/no), and delivery type (vaginal, caesarean). To note, the WAIS has been adapted in Chile with good reported reliability and validity.<sup>32-33</sup> At the child level, four confounders were included, namely, child sex (boy/girl), weight at birth ( $\geq 2500$  grams, yes/no), whether the child was placed in an incubator after delivery (yes/no), and age at first assessment in wave 1.

### **Patient and Public Involvement**

The development of the research question and outcome measures, along with study design and recruitment to, were not directly informed by patients' priorities, experience or preference. Study findings will be disseminated to the Ministry of Labor and Social Welfare, whom were responsible for waves 1 and 2, and the Ministry of Social Development, who is currently responsible for wave 3 of the ELPI cohort, ensuring greater likelihood of dissemination to study participants.

### **Statistical Analysis**

We employed the use of propensity score matching (PSM), a statistical approach which attempts to ensure equivalence between treatment and control groups (i.e., breastfed, not breastfed), by matching groups on the most relevant factors, subsequently reducing selection bias and confounding. That is, comparisons are made between children who were breastfed and those who were not based on their measured characteristics and similar propensities for being breastfed. Nearest neighbour 1:1 models, with replacement were used. In nearest neighbour matching, groups are first randomly ordered to reduce possible bias in the matching procedure, with matching then occurring sequentially. To ensure the most optimal matches between pairs on propensity scores, we imposed a caliper of a tenth of a standard deviation. That is, for a match to occur, the propensity score of a child who was breastfed to a child who was not, had to fall within a tenth of a standard deviation of one another. Matching with replacement was necessary given the low rates of children who were never breastfed. While this technique can result in larger amounts of variance, it has been argued to reduce

bias by ensuring matches are of better quality.<sup>34</sup> All children fell within the area of common support which refers to cases being excluded as a result of not fitting within the specified caliper. See Figure 1 for the overlapping support of the distribution of propensity scores. To ensure the overall quality of the matching procedure, balance checks were conducted on individual confounders and the overall models. For individual factors, remaining bias ranged between 0.0 and 18.8% (see Figure 2) and the overall mean remaining bias for models ranged between 5.5% and 8.3%. It has been suggested that less than 20% remaining bias is indicative of good matching,<sup>35</sup> thus we concluded that our matching was successful. We report on the average treatment effects of those treated (ATT). All analyses were conducted using Stata v14 software. We use the term significant henceforth to denote statistical significance, using a threshold of  $p = <.05$ .

## Results

Comparing children never breastfed to those who were breastfed up to six months inclusive, significant differences in favour of those who were breastfed were found on two of the behavioural subscales (i.e., emotionally reactive and somatic complaints). These results remained significant following matching whereby children who were breastfed had lower scores on these subscales (i.e., a mean difference of -1.00,  $d = -0.23$  and -1.02,  $d = -0.27$  respectively). Comparing children who were never breastfed to those breastfed between seven and 12 months inclusive, significant differences were found prior to matching on all subscales with the exception of anxious/depressed and sleep problems. After matching, significant differences remained for emotional reactivity and attention problems only (i.e., a mean difference of -0.86,  $d = -0.21$  and -0.50,  $d = -0.22$ , respectively), with reduced difficulties for children who were breastfed. Comparing those never breastfed to the extended group (i.e., 13 months or more), pre-matching results were similar to the first model with lower scores on the emotionally reactive and somatic complaints subscales. Post matching revealed no remaining significant differences between groups. All results can be found in Table 3.

## Discussion

While causality remains an ongoing debate, owing to the ethical constraints of conducting RCTs, our results add to the emerging corpus of literature trying to untangle the 'effects' of breastfeeding on behavioural outcomes by using a PSM approach in a Chilean cohort. Given the knowledge of family and maternal characteristics commonly observed of children who are breastfed, the use of matching helps to ensure that differences between groups on these observable characteristics are significantly minimised, so that the propensity to be breastfed across groups is arguably comparable. As a result, only post-matching results are discussed. Due to exclusions, our results have implications only for children who were born full term.

The results suggest that breastfeeding may be an effective low-cost early investment for reducing difficulties with emotional reactivity and somatic complaints, in addition to attention problems experienced

1 in early childhood; all of which are indicative of neurodevelopmental difficulties. Duration appears to be an  
2 important factor implicated in these associations. For example, results revealed that any breastfeeding during  
3 the first six months, and up to 12 full months, contributed to reductions in children's difficulties with  
4 emotional reactivity and somatic complaints up to four years of age. In comparison, a minimum of at least six  
5 full months or more of breastfeeding was required for observed benefits related to attention problems at the  
6 same age. This latter finding is in line with findings from Girard et al.,<sup>11</sup> who also used PSM in a nationally  
7 representative sample of infants from Ireland. The similar results found around three years of age, across  
8 these two unique cohorts, whilst using PSM, demonstrates favourable support for a direct mechanism  
9 between breastfeeding and reduced attention problems in early childhood, rather than confounding per se.  
10  
11 Worth noting is the link found between inattention/hyperactivity, regulation difficulties and mood  
12 disorders<sup>36</sup>, and their link with deficiencies in arachidonic acid and docosahexaenoic acid.<sup>37</sup> Given the types  
13 of behaviours where reductions for those breastfed are found in this study, and in the context of previous  
14 studies (e.g.,<sup>8-10, 36-37</sup>), a plausible hypothesis might be that of the nutrients found in breastmilk contributing to  
15 the growing infant's brain development. More research in this area, using well designed and rigorously sound  
16 methodology is first needed before firm conclusions can be drawn.

17  
18 While our results suggest statistically significant differences in favour of children who were breastfed  
19 at least six full months (and up until 12 full months), as compared to those who were never breastfed on  
20 emotional reactivity, somatic complaints, and inattention, the magnitude of effect for each behaviour was  
21 found to be small (i.e., Cohen's  $d = < .30$ ). The practical and clinical significance of our results is arguably  
22 interpretable in the eye of the 'stakeholder'. A small reduction in a child's emotional reactivity, somatic  
23 complaints, and/or inattention in everyday situations may carry greater importance to a first-time or  
24 multiparous mother experiencing high levels of stress and fatigue as a result of limited financial and/or  
25 personal resources. On the other hand, within a clinical context, the effect sizes found may be perceived as  
26 carrying less practical importance.

27  
28 Conversely, no benefits of extended breastfeeding were found on children's internalising or  
29 externalising behavioural problems. This may suggest a non-linear dose-response effect of breastfeeding on  
30 behaviour, similar to previous findings. (e.g.,<sup>12</sup>) While the recommendations put forth by the WHO for  
31 continued partial breastfeeding up to two years of age or more for the physical health and growth of infants  
32 has been suggested, we observed no additional benefits of extended breastfeeding on behavioural problems in  
33 this sample. These findings do not however contradict these recommendations regarding the many afforded  
34 medical benefits of extended durations of breastfeeding. Of interest and as can be seen in Table 1, mothers  
35 who breastfed for extended durations in Chile had similar characteristics to mothers who had never breastfed,  
36 leading to poorer quality matching. For example, in both the never- and extended breastfeeding groups, a  
37 significantly higher proportion of mothers had never worked, were in the public tier of the health system, had  
38  
39  
40  
41  
42  
43  
44  
45  
46  
47  
48  
49  
50  
51  
52  
53  
54  
55  
56  
57  
58  
59

1 only completed education at the primary level and had below average scores on both the digit and vocabulary  
2 scales of the WAIS; factors which when previously controlled, have reduced observed associations between  
3 breastfeeding and children's cognitive and behavioural development outcomes. While a non-linear dose-  
4 response hypothesis is plausible, these findings also likely support what is already known. Maternal  
5 characteristics contribute to children's behavioural outcomes and the nutrients alone found in breastmilk may  
6 be only part of the story. Moreover, it supports the differences in confounding structures of breastfeeding in  
7 developing and developed countries.<sup>20,22</sup>

12 Notable strengths of this study include the use of the largest nationally representative cohort of  
13 Chilean children to date, where self-selection and confounding structures differ from developed countries,  
14 whilst utilising PSM, with a large number of matching confounders to reduce differences across groups, of  
15 which included maternal IQ. Despite these strengths, notable limitations must be mentioned. While  
16 information on necessary supplementation was asked, there was no specific information regarding full  
17 breastfeeding, limiting our ability to examine its impact. This is an important issue given the differences in  
18 feeding experiences and the potential for dilution of effects from breastfeeding to behaviour. In the same  
19 vein, no information regarding direct breastfeeding versus expressed breast milk was collected; information  
20 which may help in better understanding pathways of effect. Due to our inclusion/exclusion criteria, the  
21 sample size was significantly reduced, with some statistically significant differences between the originally  
22 recruited cohort and those included in the current study, indicative of potential selection bias. Thus,  
23 warranting replication. Additionally, despite the benefits afforded by PSM techniques, matching is only  
24 possible on observable characteristics. While we were able to include a multitude of health and social  
25 confounders, including maternal IQ, it remains possible that unobservable characteristics contribute to the  
26 associations. Relatedly, the quality of matching for the extended breastfeeding families as compared to the  
27 never breastfeeding families was not as successful compared to the matching between the other groups, due  
28 to the initial similarities on health and social factors. The included covariates used for matching were  
29 theoretically motivated and thus, we kept the integrity of matching variables intact across all models.  
30 However, the findings from this model (i.e., the extended breastfeeding families) warrants caution in  
31 interpretation. Future studies are needed to more carefully evaluate extended breastfeeding and potential  
32 associations with behavioural outcomes, in the context of differing confounding structure. Finally, shared  
33 method variance is a concern given that parent reports were used to collect information on both breastfeeding  
34 duration and child behaviours.

35 Despite these limitations, and in the context of the strengths of this study, we believe these results  
36 contribute important findings, namely more support for the potential of 'causal paths'. A comprehensive  
37 answer to the question of effects on psychosocial development remains unanswered without the use of RCTs.  
38 However, with replication across regions, whilst using more stringent methodological approaches to help in



1 reducing bias inherent in observational studies, promise for better understanding of potential mechanisms is  
2 viable.  
3  
4  
5

## 6 References

- 7 1. Horta BL, Loret de Mola C, Victora CG. Long-term consequences of breastfeeding on cholesterol,  
8 obesity, systolic blood pressure and type 2 diabetes: a systematic review and meta-analysis. *Acta*  
9 *Paediatrica*. 2015 Dec 1;104(S467):30-7.  
10  
11
- 12 2. Ip S, Chung M, Raman G, Trikalinos TA, Lau J. A summary of the Agency for Healthcare Research  
13 and Quality's evidence report on breastfeeding in developed countries. *Breastfeeding Medicine*. 2009  
14 Oct 1;4(S1):S-17.  
15  
16
- 17 3. Taylor, J. S., Kacmar, J. E., Nothnagle, M., & Lawrence, R. A. (2005). A systematic review of the  
18 literature associating breastfeeding with type 2 diabetes and gestational diabetes. *Journal of the*  
19 *American College of Nutrition*, 24(5), 320-326. doi:10.1080/07315724.2005.10719480.  
20  
21
- 22 4. Britton, J. R., Britton, H. L., & Gronwaldt, V. (2006). Breastfeeding, sensitivity, and attachment.  
23 *Pediatrics*, 118(5), e1436-e1443. doi:10.1542/peds.2005-2916.  
24  
25
- 26 5. Liu J, Leung P, Yang A. Breastfeeding and active bonding protects against children's internalizing  
27 behavior problems. *Nutrients*. 2013 Dec 24;6(1):76-89.  
28  
29
- 30 6. Sarkar S, Craig MC, Catani M, Dell'Acqua F, Fahy T, Deeley Q, Murphy DG. Frontotemporal white-  
31 matter microstructural abnormalities in adolescents with conduct disorder: a diffusion tensor imaging  
32 study. *Psychological Medicine*. 2013 Feb;43(2):401-11.  
33  
34
- 35 7. Silk TJ, Vance A, Rinehart N, Bradshaw JL, Cunningham R. White-matter abnormalities in attention  
36 deficit hyperactivity disorder: a diffusion tensor imaging study. *Human Brain Mapping*. 2009 Sep  
37 15;30(9):2757-65.  
38  
39
- 40 8. DeMar JC, Ma K, Bell JM, Igarashi M, Greenstein D, Rapoport SI. One generation of n-3  
41 polyunsaturated fatty acid deprivation increases depression and aggression test scores in rats. *Journal*  
42 *of Lipid Research*. 2006 Jan 1;47(1):172-80.  
43  
44
- 45 9. Fedorova I, Alvheim AR, Hussein N, Salem Jr N. Deficit in prepulse inhibition in mice caused by  
46 dietary n-3 fatty acid deficiency. *Behavioral Neuroscience*. 2009 Dec;123(6):1218.  
47  
48
- 49 10. Janssen CI, Kiliaan AJ. Long-chain polyunsaturated fatty acids (LCPUFA) from genesis to  
50 senescence: the influence of LCPUFA on neural development, aging, and neurodegeneration.  
51 *Progress in Lipid Research*. 2014 Jan 31;53:1-7.  
52  
53
- 54 11. Girard LC, Doyle O, Tremblay RE. Breastfeeding, cognitive and noncognitive development in early  
55 childhood: a population study. *Pediatrics*. 2017 Mar 27:e20161848.  
56  
57
- 58 12. Girard LC, Doyle O, Tremblay RE. Breastfeeding and externalising problems: a quasi-experimental  
59 design with a national cohort. *European Child & Adolescent Psychiatry*. 2017 Nov 24:1-8.  
60

- 1 13. Lind JN, Li R, Perrine CG, Schieve LA. Breastfeeding and later psychosocial development of  
2 children at 6 years of age. *Pediatrics*. 2014 Sep 1;134(Supplement 1):S36-41.  
3
- 4 14. Belfort MB, Rifas-Shiman SL, Kleinman KP, Bellinger DC, Harris MH, Taveras EM, Gillman MW,  
5 Oken E. Infant breastfeeding duration and mid-childhood executive function, behavior, and social-  
6 emotional development. *Journal of Developmental and Behavioral Pediatrics: JDBP*. 2016  
7 Jan;37(1):43.  
8
- 9 15. Oddy WH, Li J, Robinson M, Whitehouse AJ. The long-term effects of breastfeeding on  
10 development. *Contemporary Pediatrics*. 2012. InTech.  
11
- 12 16. de Mola CL, Horta BL, Gonçalves H, de Avila Quevedo L, Pinheiro R, Gigante DP, dos Santos  
13 Motta JV, Barros FC. Breastfeeding and mental health in adulthood: A birth cohort study in Brazil.  
14 *Journal of Affective Disorders*. 2016 Sep 15;202:115-9.  
15
- 16 17. Fergusson DM, Woodward LJ. Breast feeding and later psychosocial adjustment. *Paediatric and*  
17 *perinatal epidemiology*. 1999 Apr 1;13(2):144-57.  
18
- 19 18. Kwok MK, Leung GM, Schooling CM. Breast feeding and early adolescent behaviour, self-esteem  
20 and depression: Hong Kong's 'Children of 1997' birth cohort. *Archives of Disease in Childhood*. 2013  
21 Nov 1;98(11):887-94.  
22
- 23 19. Girard LC, Côté SM, de Lauzon-Guillain B, Dubois L, Falissard B, Forhan A, Doyle O, Bernard JY,  
24 Heude B, Saurel-Cubizolles MJ, Kaminski M. Factors associated with breastfeeding initiation: a  
25 comparison between France and French-speaking Canada. *PloS One*. 2016 Nov 30;11(11):e0166946.  
26
- 27 20. Victora CG, Bahl R, Barros AJ, França GV, Horton S, Krasevec J, Murch S, Sankar MJ, Walker N,  
28 Rollins NC. Breastfeeding in the 21st century: epidemiology, mechanisms, and lifelong effect. *The*  
29 *Lancet*. 2016 Feb 5;387(10017):475-90.  
30
- 31 21. Walfisch A, Sermer C, Cressman A, Koren G. Breast milk and cognitive development—the role of  
32 confounders: a systematic review. *BMJ Open*. 2013 Aug 1;3(8):e003259.  
33
- 34 22. Brion MJ, Lawlor DA, Matijasevich A, Horta B, Anselmi L, Araújo CL, Menezes AM, Victora CG,  
35 Smith GD. What are the causal effects of breastfeeding on IQ, obesity and blood pressure? Evidence  
36 from comparing high-income with middle-income cohorts. *International Journal of Epidemiology*.  
37 2011 Feb 24;40(3):670-80.  
38
- 39 23. Lutter CK, Chaparro CM, Grummer-Strawn LM. Increases in breastfeeding in Latin America and the  
40 Caribbean: an analysis of equity. *Health Policy and Planning*. 2010 Sep 28;26(3):257-65.  
41
- 42 24. Pérez-Escamilla R. Breastfeeding and the nutritional transition in the Latin American and Caribbean  
43 Region: a success story? *Cadernos de Saude Publica*. 2003 Jan;19:S119-27.  
44
- 45 25. OCED. OCED economic surveys Chile. 2015. Retrieved from  
46 <http://www.oecd.org/eco/surveys/Chile-2015-overview.pdf>, 15 September 2018.  
47
- 48 26. UNICEF. Estado mundial de la infancia 2014 en cifras [World state of infancy 2014 in numbers].  
49 2014. Retrieved from <https://www.unicef.org/spanish/sowc2014/numbers/>, 05 February 2018.  
50



- 1 27. World Health Organization, & UNICEF. Global strategy for infant and young child feeding. *Geneva, Switzerland: World Health Organization Press*. 2003.
- 2
- 3
- 4 28. Bravo D. Encuesta Longitudinal de la Primera Infancia. Centro Micro Datos Departamento Economía
- 5 Universidad de Chile[Links]. 2012.
- 6
- 7
- 8 29. Achenbach, T.M., & Rescorla, L.A. Manual for the ASEBA School-Age Forms & Profiles.
- 9 Burlington, VT: University of Vermont, Research Center for Children, Youth, & Families. 2001.
- 10
- 11 30. Ivanova MY, Achenbach TM, Rescorla LA, Harder VS, Ang RP, Bilenberg N, Bjarnadottir G,
- 12 Capron C, De Pauw SS, Dias P, Dobrean A. Preschool psychopathology reported by parents in 23
- 13 societies: testing the seven-syndrome model of the child behavior checklist for ages 1.5–5. *Journal of*
- 14 *the American Academy of Child & Adolescent Psychiatry*. 2010 Dec 1;49(12):1215-24.
- 15
- 16
- 17 31. Wechsler, D. The measurement of adult intelligence. Baltimore, MD: William and Wilkins. 1939.
- 18
- 19
- 20 32. Berdicewski O, Herreros R. Normas de adaptación WAIS a Chile (Doctoral dissertation, Tesis de
- 21 Grado no publicada), Universidad de Chile, Santiago, Chile. 1960.
- 22
- 23 33. Hermosilla, M. La Escala de Inteligencia de Wechsler para adultos [Wechsler intelligence scale for
- 24 adults] (unpublished manuscript). Escuela de Psicología, Pontificia Universidad Católica de Chile,
- 25 Santiago, Chile. 1982.
- 26
- 27
- 28 34. Caliendo M, Kopeinig S. Some practical guidance for the implementation of propensity score
- 29 matching. *Journal of Economic Surveys*. 2008 Feb 1;22(1):31-72.
- 30
- 31
- 32 35. Rosenbaum PR, Rubin DB. The bias due to incomplete matching. *Biometrics*. 1985;41(1):103–116.
- 33
- 34 36. Hirshfeld-Becker DR, Biederman J, Faraone SV, Violette H, Wrightsman J, Rosenbaum JF.
- 35 Temperamental correlates of disruptive behavior disorders in young children: preliminary findings.
- 36 *Biological Psychiatry*. 2002 Apr 1;51(7):563-74.
- 37
- 38
- 39 37. Richardson AJ. Omega-3 fatty acids in ADHD and related neurodevelopmental disorders.
- 40 *International Review of Psychiatry*. 2006 Jan 1;18(2):155-72.
- 41
- 42
- 43
- 44
- 45
- 46
- 47
- 48
- 49
- 50
- 51
- 52
- 53
- 54
- 55
- 56
- 57
- 58
- 59
- 60

**Table 1:** Family, maternal, infant, and medical characteristics: Infant cohort between 7 and 24 months

|                                                    | Never<br>breastfeed<br>(n=140) | 1-6 months<br>(n=1277) | 7-12 months<br>(n=1234) | 13 months or<br>more<br>(n=1282) | <i>p</i>    |
|----------------------------------------------------|--------------------------------|------------------------|-------------------------|----------------------------------|-------------|
| <b>Resident spouse/partner (yes)</b>               | 90 (64.3)                      | 851 (66.6)             | 859 (69.6)              | 891 (69.5)                       | <i>ns</i>   |
| <b>Social class</b>                                |                                | <b>n (%)</b>           | <b>n (%)</b>            | <b>n (%)</b>                     | $\leq .001$ |
| Professional/managerial                            | 8 (5.7)                        | 111 (8.7)              | 98 (7.9)                | 116 (9.0)                        |             |
| Non-manual/skilled manual                          | 50 (35.7)                      | 512 (40.1)             | 487 (39.5)              | 355 (27.7)                       |             |
| Semiskilled/unskilled                              | 5 (3.6)                        | 33 (2.6)               | 23 (1.9)                | 34 (2.7)                         |             |
| Never worked                                       | 77 (55.0)                      | 621 (48.6)             | 626 (50.7)              | 777 (60.6)                       |             |
| <b>Health provisional system</b>                   |                                |                        |                         |                                  | $\leq .001$ |
| Public system                                      | 127 (90.7)                     | 1107 (86.7)            | 1069 (86.6)             | 1205 (94.0)                      |             |
| Private system                                     | 13 (9.3)                       | 170 (13.3)             | 165 (13.4)              | 77 (6.0)                         |             |
| <b>Maternal education</b>                          |                                |                        |                         |                                  | $\leq .001$ |
| No formal education                                | 0 (0)                          | 3 (0.2)                | 4 (0.3)                 | 7 (0.5)                          |             |
| Primary complete                                   | 26 (18.6)                      | 155 (12.1)             | 154 (12.5)              | 279 (21.8)                       |             |
| Secondary complete                                 | 59 (42.1)                      | 491 (38.4)             | 483 (39.1)              | 544 (42.4)                       |             |
| Vocational training                                | 42 (30.0)                      | 441 (34.5)             | 392 (31.8)              | 347 (27.1)                       |             |
| University training                                | 13 (9.3)                       | 163 (12.8)             | 176 (14.3)              | 86 (6.7)                         |             |
| Postgraduates studies                              | 0 (0)                          | 13 (1.0)               | 17 (1.4)                | 7 (0.5)                          |             |
| Unknown                                            | 0 (0)                          | 11 (0.9)               | 8 (0.6)                 | 12 (0.9)                         |             |
| <b>Maternal working status (yes)</b>               | 51 (36.4)                      | 533 (41.7)             | 505 (40.9)              | 407 (31.7)                       | $\leq .001$ |
| <b>Maternal age</b>                                |                                |                        |                         |                                  | $\leq .001$ |
| $\leq 24$                                          | 66 (47.1)                      | 524 (41.0)             | 425 (34.4)              | 485 (37.8)                       |             |
| 25-29                                              | 21 (15.0)                      | 294 (23.0)             | 311 (25.2)              | 258 (20.1)                       |             |
| 30-34                                              | 27 (19.3)                      | 239 (18.7)             | 284 (23.0)              | 265 (20.7)                       |             |
| $\geq 35$                                          | 26 (18.6)                      | 220 (17.2)             | 214 (17.3)              | 274 (21.4)                       |             |
| <b>Maternal IQ</b>                                 |                                |                        |                         |                                  |             |
| WAIS digit (below average)                         | 103 (73.6)                     | 825 (64.6)             | 768 (62.2)              | 918 (71.6)                       | $\leq .001$ |
| WAIS vocabulary (below average)                    | 73 (52.1)                      | 534 (41.8)             | 502 (40.7)              | 671 (52.3)                       | $\leq .001$ |
| <b>Maternal depression during pregnancy (yes)</b>  | 23 (16.4)                      | 178 (13.9)             | 185 (15.0)              | 188 (14.7)                       | <i>ns</i>   |
| <b>Smoking during pregnancy (yes)</b>              | 19 (13.6)                      | 141 (11.0)             | 101 (8.2)               | 151 (11.8)                       | .011        |
| <b>Alcohol use during pregnancy (yes)</b>          | 14 (10.0)                      | 96 (7.5)               | 77 (6.2)                | 96 (7.5)                         | <i>ns</i>   |
| <b>Drugs use during pregnancy (yes)</b>            | 4 (2.9)                        | 7 (0.5)                | 8 (0.6)                 | 10 (0.8)                         | .025        |
| <b>Delivery mode (caesarean)</b>                   | 72 (51.4)                      | 606 (47.5)             | 578 (46.8)              | 503 (39.2)                       | $\leq .001$ |
| <b>Birth weight (<math>\geq 2500</math>g, yes)</b> | 11 (7.9)                       | 34 (2.7)               | 30 (2.4)                | 28 (2.2)                         | .001        |
| <b>Stay in incubator (yes)</b>                     | 12 (8.6)                       | 46 (3.6)               | 44 (3.6)                | 49 (3.8)                         | .030        |
| <b>Infant sex (boy)</b>                            | 67 (47.9)                      | 658 (51.5)             | 637 (51.6)              | 630 (49.1)                       | <i>ns</i>   |

Note: The health provisional system was used as a proxy for the financial status of the family, whereby families in the private system are generally of higher income. Maternal IQ was assessed using both the digit and vocabulary scales of the Wechsler Intelligence Adult Scale, WAIS (Wechsler, 1939). A below average score is defined as a score of 8 or below on the digit and vocabulary scales.

**Table 2:** Bivariate Correlations and Means (Standard Deviations) of Children's Behaviours

|                      | Emotionally<br>reactive | Anxious/<br>depressed | Somatic<br>complaints | Withdrawn | Sleep<br>problems | Attention<br>problems | Aggressive |
|----------------------|-------------------------|-----------------------|-----------------------|-----------|-------------------|-----------------------|------------|
| Emotionally reactive |                         |                       |                       |           |                   |                       |            |
| Anxious/depressed    | .650**                  |                       |                       |           |                   |                       |            |
| Somatic complaints   | .549**                  | .499**                |                       |           |                   |                       |            |
| Withdrawn            | .569**                  | .548**                | .435**                |           |                   |                       |            |
| Sleep problems       | .445**                  | .404**                | .373**                | .350**    |                   |                       |            |
| Attention problems   | .428**                  | .374**                | .319**                | .345**    | .341**            |                       |            |
| Aggressive           | .664**                  | .542**                | .409**                | .496**    | .477**            | .619**                |            |
| Mean                 | 3.11                    | 4.33                  | 3.10                  | 2.92      | 2.83              | 3.72                  | 13.68      |
| Standard deviation   | 2.94                    | 3.01                  | 2.63                  | 2.38      | 2.62              | 1.97                  | 8.35       |

Note: \*\* denotes statistical significance at the 0.01 level

**Table 3: Breastfeeding and Children's Behavioural Problems: Pre and Post Matching Results**

| Up to 6 months                 | Pre Matching |       |                 |      | Post Matching |       |                |      |
|--------------------------------|--------------|-------|-----------------|------|---------------|-------|----------------|------|
|                                | T            | C     | Diff (Sig.)     | S.E  | T             | C     | Diff (Sig.)    | S.E  |
| Emotionally reactive           | 3.16         | 3.98  | <b>-0.81**</b>  | 0.30 | 3.16          | 4.17  | <b>-1.00*</b>  | 0.43 |
| Anxious/depressed              | 4.38         | 4.67  | -0.29           | 0.29 | 4.38          | 4.59  | -0.21          | 0.39 |
| Somatic complaints             | 3.09         | 3.73  | <b>-0.64*</b>   | 0.25 | 3.09          | 4.11  | <b>-1.02**</b> | 0.38 |
| Withdrawn                      | 3.00         | 3.16  | -0.15           | 0.24 | 3.00          | 3.15  | -0.15          | 0.31 |
| Sleep problems                 | 2.86         | 3.07  | -0.20           | 0.26 | 2.86          | 3.40  | -0.53          | 0.36 |
| Attention problems             | 3.79         | 4.05  | -0.26           | 0.19 | 3.79          | 3.85  | -0.06          | 0.22 |
| Aggression                     | 13.91        | 14.90 | -0.98           | 0.85 | 13.91         | 14.65 | -0.74          | 1.18 |
| <b>Between 7 and 12 months</b> |              |       |                 |      |               |       |                |      |
| Emotionally reactive           | 2.85         | 3.98  | <b>-1.12***</b> | 0.29 | 2.85          | 3.71  | <b>-0.86*</b>  | 0.41 |
| Anxious/depressed              | 4.12         | 4.67  | -0.54           | 0.30 | 4.12          | 4.39  | -0.26          | 0.39 |
| Somatic complaints             | 2.95         | 3.73  | <b>-0.78**</b>  | 0.26 | 2.95          | 3.65  | -0.70          | 0.37 |
| Withdrawn                      | 2.70         | 3.16  | <b>-0.45*</b>   | 0.22 | 2.70          | 3.06  | -0.36          | 0.30 |
| Sleep problems                 | 2.68         | 3.07  | -0.38           | 0.26 | 2.68          | 2.93  | -0.25          | 0.35 |
| Attention problems             | 3.57         | 4.05  | <b>-0.48*</b>   | 0.19 | 3.57          | 4.07  | <b>-0.50*</b>  | 0.22 |
| Aggression                     | 13.02        | 14.90 | <b>-1.87*</b>   | 0.81 | 13.02         | 13.85 | -0.83          | 1.16 |
| <b>13 months or more</b>       |              |       |                 |      |               |       |                |      |
| Emotionally reactive           | 3.20         | 3.98  | <b>-0.77*</b>   | 0.30 | 3.20          | 3.66  | -0.45          | 0.48 |
| Anxious/depressed              | 4.42         | 4.67  | -0.24           | 0.31 | 4.42          | 4.53  | -0.10          | 0.43 |
| Somatic complaints             | 3.18         | 3.73  | <b>-0.55*</b>   | 0.27 | 3.18          | 3.43  | -0.25          | 0.42 |
| Withdrawn                      | 3.01         | 3.16  | -0.15           | 0.24 | 3.01          | 3.17  | -0.16          | 0.34 |
| Sleep problems                 | 2.92         | 3.07  | -0.15           | 0.27 | 2.92          | 2.65  | 0.26           | 0.40 |
| Attention problems             | 3.76         | 4.05  | -0.29           | 0.20 | 3.76          | 3.77  | -0.01          | 0.24 |
| Aggression                     | 13.91        | 14.90 | -0.98           | 0.86 | 13.91         | 12.44 | 1.46           | 1.32 |

Note: \*\*\* denotes significance at the  $p = < .001$  level, \*\* at the .01 level, \* at the .05 level. T denotes 'treatment' (breastfed) and C denotes 'control' (not breastfed). 'Diff' represents the difference in scores between groups. S.E. refers to the standard errors. For being breastfed up to 6 months: N for the treatment group was 949 and 110 for the control group. For being breastfed between 7 and 12 months: N for the treatment group was 946 and 110 for the control group. For being breastfed 13 months or more: N for the treatment group was 1,006 and 110 for the control group.

### Figure 1: Overlapping Support: Distribution of Propensity Scores

Note: Treated refers to children who were breastfed, untreated refers to children who were not. For being breastfed up to 6 months: N for the treatment group was 949 and 110 for the control group. For being

1 breastfed between 7 and 12 months: N for the treatment group was 946 and 110 for the control group. For  
2 being breastfed 13 months or more: N for the treatment group was 1,006 and 110 for the control group.  
3

4 **Figure 2: Standardised Differences across Covariates: Pre and Post Matching**

5 Note: Treated refers to children who were breastfed, untreated refers to children who were not. For being  
6 breastfed up to 6 months: N for the treatment group was 949 and 110 for the control group. For being  
7 breastfed between 7 and 12 months: N for the treatment group was 946 and 110 for the control group. For  
8 being breastfed 13 months or more: N for the treatment group was 1,006 and 110 for the control group.  
9

10  
11  
12  
13  
14  
15  
16  
17  
18  
19  
20  
21  
22  
23  
24  
25  
26  
27  
28  
29  
30  
31  
32  
33  
34  
35  
36  
37  
38  
39  
40  
41  
42  
43  
44  
45  
46  
47  
48  
49  
50  
51  
52  
53  
54  
55  
56  
57  
58  
59  
60

For peer review only

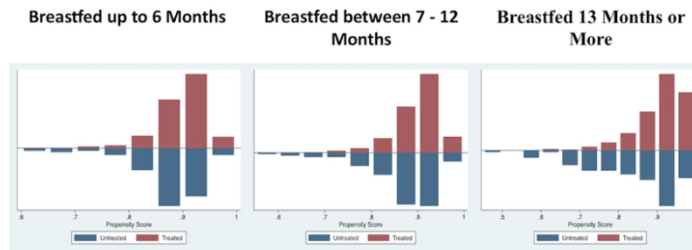

Figure 1: Overlapping Support: Distribution of Propensity Scores

Note: Treated refers to children who were breastfed, untreated refers to children who were not. For being breastfed up to 6 months: N for the treatment group was 949 and 110 for the control group. For being breastfed between 7 and 12 months: N for the treatment group was 946 and 110 for the control group. For being breastfed 13 months or more: N for the treatment group was 1,006 and 110 for the control group.

99x56mm (300 x 300 DPI)

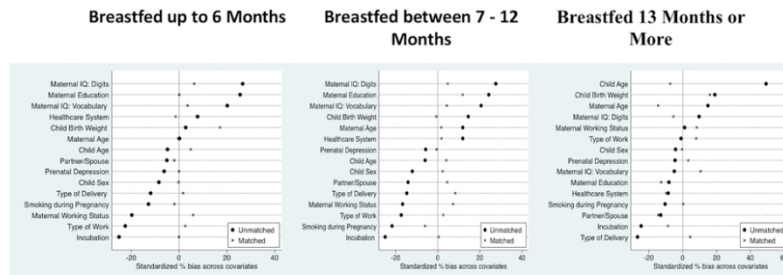

Figure 2: Standardised Differences across Covariates: Pre and Post Matching.

Note: Treated refers to children who were breastfed, untreated refers to children who were not. For being breastfed up to 6 months: N for the treatment group was 949 and 110 for the control group. For being breastfed between 7 and 12 months: N for the treatment group was 946 and 110 for the control group. For being breastfed 13 months or more: N for the treatment group was 1,006 and 110 for the control group.

99x56mm (300 x 300 DPI)

## Online Supplement 1

## Family, maternal, infant, and medical characteristics: A comparison between the Entire and Included Cohort

|                                            | Entire Cohort<br>N = 14,161 (%) | Included Families<br>N = 3,933 (%) | <i>p</i>  |
|--------------------------------------------|---------------------------------|------------------------------------|-----------|
| Resident spouse/partner (yes)              | 6,873 (69.2%)                   | 2,691 (68.4%)                      | <i>ns</i> |
| Social class                               |                                 |                                    | ≤ .001    |
| Professional/managerial                    | 968 (9.7%)                      | 333 (8.5%)                         |           |
| Non-manual/skilled manual                  | 3,812 (38.4%)                   | 1,404 (35.7%)                      |           |
| Semi-skilled/unskilled                     | 374 (3.8%)                      | 95 (2.4%)                          |           |
| Never worked                               | 4,779 (48.1%)                   | 2,101 (53.4%)                      |           |
| Health provisional system                  |                                 |                                    | <i>ns</i> |
| Public system                              | 8,820 (88.8%)                   | 3,508 (89.2%)                      |           |
| Private system                             | 1,113 (11.2%)                   | 425 (10.8%)                        |           |
| Maternal education                         |                                 |                                    | <i>ns</i> |
| No formal education                        | 37 (0.4%)                       | 14 (0.4%)                          |           |
| Primary complete                           | 1,743 (17.7%)                   | 614 (15.7%)                        |           |
| Secondary Complete                         | 3,917 (39.8%)                   | 1,577 (40.4%)                      |           |
| Vocational training                        | 2,984 (30.3%)                   | 1,222 (31.3%)                      |           |
| University training                        | 1,075 (10.9%)                   | 438 (11.2%)                        |           |
| Postgraduate studies                       | 81 (0.8%)                       | 37 (0.9%)                          |           |
| Maternal working status (yes)              | 4,366 (44.0%)                   | 1,496 (38.0%)                      | ≤ .001    |
| Maternal age                               |                                 |                                    | ≤ .001    |
| ≤ 24                                       | 2,806 (28.2%)                   | 1,500 (38.1%)                      |           |
| 25-29                                      | 2,250 (22.7%)                   | 884 (22.5%)                        |           |
| 30-34                                      | 2,173 (21.9%)                   | 815 (20.7%)                        |           |
| ≥ 35                                       | 2,704 (27.2%)                   | 734 (18.7%)                        |           |
| Maternal depression during pregnancy (yes) | 1,027 (10.3%)                   | 574 (14.6%)                        | ≤ .001    |
| Smoking during pregnancy (yes)             | 978 (9.9%)                      | 412 (10.5%)                        | <i>ns</i> |
| Alcohol use during pregnancy (yes)         | 705 (7.1%)                      | 283 (7.2%)                         | <i>ns</i> |
| Drug use during pregnancy (yes)            | 81 (0.8%)                       | 29 (0.7%)                          | <i>ns</i> |
| Delivery mode (caesarean)                  | 4,314 (43.5%)                   | 1,759 (44.7%)                      | <i>ns</i> |
| Birth weight (≥ 2500g, yes)                | 205 (2.3%)                      | 103 (2.6%)                         | <i>ns</i> |
| Stay in incubator (yes)                    | 433 (4.4%)                      | 151 (3.8%)                         | <i>ns</i> |
| Infant sex (boy)                           | 5,004 (50.4%)                   | 1,992 (50.6%)                      | <i>ns</i> |



1  
2  
3  
4  
5  
6  
7  
8  
9  
10  
11  
12  
13  
14  
15  
16  
17  
18  
19  
20  
21  
22  
23  
24  
25  
26  
27  
28  
29  
30  
31  
32  
33  
34  
35  
36  
37  
38  
39  
40  
41  
42  
43  
44  
45  
46  
47  
48  
49  
50  
51  
52  
53  
54  
55  
56  
57  
58  
59  
60

## STROBE Statement—checklist of items that should be included in reports of observational studies

|                              | Item No | Recommendation                                                                                                                                                                                                                                                                                                                                                                                                                                                                                                                                                                                                                                                                                                                                                |
|------------------------------|---------|---------------------------------------------------------------------------------------------------------------------------------------------------------------------------------------------------------------------------------------------------------------------------------------------------------------------------------------------------------------------------------------------------------------------------------------------------------------------------------------------------------------------------------------------------------------------------------------------------------------------------------------------------------------------------------------------------------------------------------------------------------------|
| <b>Title and abstract</b>    | 1       | (a) Indicate the study's design with a commonly used term in the title or the abstract: <b>In both, Pgs. 1 and 2.</b><br>(b) Provide in the abstract an informative and balanced summary of what was done and what was found <b>Pg. 2.</b>                                                                                                                                                                                                                                                                                                                                                                                                                                                                                                                    |
| <b>Introduction</b>          |         |                                                                                                                                                                                                                                                                                                                                                                                                                                                                                                                                                                                                                                                                                                                                                               |
| Background/rationale         | 2       | Explain the scientific background and rationale for the investigation being reported <b>Pgs. 3-4</b>                                                                                                                                                                                                                                                                                                                                                                                                                                                                                                                                                                                                                                                          |
| Objectives                   | 3       | State specific objectives, including any prespecified hypotheses. <b>Pg. 4</b>                                                                                                                                                                                                                                                                                                                                                                                                                                                                                                                                                                                                                                                                                |
| <b>Methods</b>               |         |                                                                                                                                                                                                                                                                                                                                                                                                                                                                                                                                                                                                                                                                                                                                                               |
| Study design                 | 4       | Present key elements of study design early in the paper <b>Pgs. 4-5.</b>                                                                                                                                                                                                                                                                                                                                                                                                                                                                                                                                                                                                                                                                                      |
| Setting                      | 5       | Describe the setting, locations, and relevant dates, including periods of recruitment, exposure, follow-up, and data collection <b>Pgs. 4-5.</b>                                                                                                                                                                                                                                                                                                                                                                                                                                                                                                                                                                                                              |
| Participants                 | 6       | (a) <i>Cohort study</i> —Give the eligibility criteria, and the sources and methods of selection of participants. Describe methods of follow-up <b>Pg. 5</b><br><i>Case-control study</i> —Give the eligibility criteria, and the sources and methods of case ascertainment and control selection. Give the rationale for the choice of cases and controls<br><i>Cross-sectional study</i> —Give the eligibility criteria, and the sources and methods of selection of participants<br>(b) <i>Cohort study</i> —For matched studies, give matching criteria and number of exposed and unexposed <b>Pgs. 5-6. + Table 3 and Figures 1 and 2.</b><br><i>Case-control study</i> —For matched studies, give matching criteria and the number of controls per case |
| Variables                    | 7       | Clearly define all outcomes, exposures, predictors, potential confounders, and effect modifiers. Give diagnostic criteria, if applicable <b>Pgs. 5-7 + Figure 2.</b>                                                                                                                                                                                                                                                                                                                                                                                                                                                                                                                                                                                          |
| Data sources/<br>measurement | 8*      | For each variable of interest, give sources of data and details of methods of assessment (measurement). Describe comparability of assessment methods if there is more than one group <b>Pgs. 5-6.</b>                                                                                                                                                                                                                                                                                                                                                                                                                                                                                                                                                         |
| Bias                         | 9       | Describe any efforts to address potential sources of bias <b>Pgs. 6-7 + Figure 2</b>                                                                                                                                                                                                                                                                                                                                                                                                                                                                                                                                                                                                                                                                          |
| Study size                   | 10      | Explain how the study size was arrived at <b>Pgs. 4-5.</b>                                                                                                                                                                                                                                                                                                                                                                                                                                                                                                                                                                                                                                                                                                    |
| Quantitative variables       | 11      | Explain how quantitative variables were handled in the analyses. If applicable, describe which groupings were chosen and why <b>Pgs. 5-6.</b>                                                                                                                                                                                                                                                                                                                                                                                                                                                                                                                                                                                                                 |
| Statistical methods          | 12      | (a) Describe all statistical methods, including those used to control for confounding <b>Pgs. 6-7</b><br>(b) Describe any methods used to examine subgroups and interactions <b>N/A</b><br>(c) Explain how missing data were addressed <b>Pg. 9 and Online Supplement</b><br>(d) <i>Cohort study</i> —If applicable, explain how loss to follow-up was addressed<br><i>Case-control study</i> —If applicable, explain how matching of cases and controls was addressed<br><i>Cross-sectional study</i> —If applicable, describe analytical methods taking account of sampling strategy<br>(e) Describe any sensitivity analyses <b>N/A</b>                                                                                                                    |

Continued on next page

## Results

|                  |     |                                                                                                                                                                                                                                                                                                                                                                                                                                                                                                                |
|------------------|-----|----------------------------------------------------------------------------------------------------------------------------------------------------------------------------------------------------------------------------------------------------------------------------------------------------------------------------------------------------------------------------------------------------------------------------------------------------------------------------------------------------------------|
| Participants     | 13* | (a) Report numbers of individuals at each stage of study—eg numbers potentially eligible, examined for eligibility, confirmed eligible, included in the study, completing follow-up, and analysed <a href="#">Table 1 and 3</a><br>(b) Give reasons for non-participation at each stage <a href="#">Pg. 4</a><br>(c) Consider use of a flow diagram <a href="#">N/A</a>                                                                                                                                        |
| Descriptive data | 14* | (a) Give characteristics of study participants (eg demographic, clinical, social) and information on exposures and potential confounders <a href="#">Table 1 and 2</a><br>(b) Indicate number of participants with missing data for each variable of interest <a href="#">N/A</a><br>(c) <i>Cohort study</i> —Summarise follow-up time (eg, average and total amount) <a href="#">Pg. 4</a>                                                                                                                    |
| Outcome data     | 15* | <i>Cohort study</i> —Report numbers of outcome events or summary measures over time <a href="#">Tables 2 and 3</a><br><i>Case-control study</i> —Report numbers in each exposure category, or summary measures of exposure<br><i>Cross-sectional study</i> —Report numbers of outcome events or summary measures                                                                                                                                                                                               |
| Main results     | 16  | (a) Give unadjusted estimates and, if applicable, confounder-adjusted estimates and their precision (eg, 95% confidence interval). Make clear which confounders were adjusted for and why they were included <a href="#">Abstract (pg. 2), Table 3 and Figure 2</a><br>(b) Report category boundaries when continuous variables were categorized <a href="#">Pg. 6</a><br>(c) If relevant, consider translating estimates of relative risk into absolute risk for a meaningful time period <a href="#">N/A</a> |
| Other analyses   | 17  | Report other analyses done—eg analyses of subgroups and interactions, and sensitivity analyses <a href="#">N/A</a>                                                                                                                                                                                                                                                                                                                                                                                             |

## Discussion

|                  |    |                                                                                                                                                                                                     |
|------------------|----|-----------------------------------------------------------------------------------------------------------------------------------------------------------------------------------------------------|
| Key results      | 18 | Summarise key results with reference to study objectives <a href="#">Pgs. 7-8</a>                                                                                                                   |
| Limitations      | 19 | Discuss limitations of the study, taking into account sources of potential bias or imprecision. Discuss both direction and magnitude of any potential bias <a href="#">Pgs. 8-9</a>                 |
| Interpretation   | 20 | Give a cautious overall interpretation of results considering objectives, limitations, multiplicity of analyses, results from similar studies, and other relevant evidence <a href="#">Pgs. 7-9</a> |
| Generalisability | 21 | Discuss the generalisability (external validity) of the study results <a href="#">Pg. 9</a>                                                                                                         |

## Other information

|         |    |                                                                                                                                                               |
|---------|----|---------------------------------------------------------------------------------------------------------------------------------------------------------------|
| Funding | 22 | Give the source of funding and the role of the funders for the present study and, if applicable, for the original study on which the present article is based |
|---------|----|---------------------------------------------------------------------------------------------------------------------------------------------------------------|

\*Give information separately for cases and controls in case-control studies and, if applicable, for exposed and unexposed groups in cohort and cross-sectional studies.

**Note:** An Explanation and Elaboration article discusses each checklist item and gives methodological background and published examples of transparent reporting. The STROBE checklist is best used in conjunction with this article (freely available on the Web sites of PLoS Medicine at <http://www.plosmedicine.org/>, Annals of Internal Medicine at <http://www.annals.org/>, and Epidemiology at <http://www.epidem.com/>). Information on the STROBE Initiative is available at [www.strobe-statement.org](http://www.strobe-statement.org).

# BMJ Open

## Breastfeeding and behavioural problems: Propensity score matching with a national cohort of infants in Chile

|                                 |                                                                                                                                                    |
|---------------------------------|----------------------------------------------------------------------------------------------------------------------------------------------------|
| Journal:                        | <i>BMJ Open</i>                                                                                                                                    |
| Manuscript ID                   | bmjopen-2018-025058.R2                                                                                                                             |
| Article Type:                   | Research                                                                                                                                           |
| Date Submitted by the Author:   | 14-Dec-2018                                                                                                                                        |
| Complete List of Authors:       | Lisa-Christine , Girard; University of Edinburgh , Clinical Psychology<br>Farkas, Chamarrita; Pontificia Universidad Catolica de Chile, Psychology |
| <b>Primary Subject Heading</b>: | Epidemiology                                                                                                                                       |
| Secondary Subject Heading:      | Paediatrics, Nutrition and metabolism, Public health                                                                                               |
| Keywords:                       | Breastfeeding, Behaviour Problems, Cohort Study                                                                                                    |
|                                 |                                                                                                                                                    |

SCHOLARONE™  
Manuscripts

1 **Breastfeeding and behavioural problems: Propensity score matching with a national cohort of infants**  
2 **in Chile**

3  
4 **Author Listing:** Lisa-Christine Girard, PhD<sup>1</sup>& Chamarrita Farkas, PhD<sup>2</sup>

5  
6 **Affiliations:** 1) School of Health in Social Science, Clinical Psychology, University of Edinburgh 2)  
7  
8 Psychology School, Pontificia Universidad Católica de Chile  
9

10  
11 **\*Corresponding Address to:** Lisa-Christine Girard, PhD. School of Health in Social Science, Clinical  
12 Psychology, University of Edinburgh, Old Medical School, Teviot Place, Edinburgh, EH8 9AG, Email: [Lisa-Christine.Girard@ed.ac.uk](mailto:Lisa-Christine.Girard@ed.ac.uk)  
13  
14

15  
16 **Short title:** Breastfeeding and behaviour

17  
18 **Abbreviations:** Encuesta Longitudinal de la Primera Infancia cohort, ELPI; Propensity Score Matching  
19 PSM; Child Behaviour Checklist CBCL; World Health Organization WHO; Randomized Control Trial RCT;  
20 Attention to Treat ATT  
21

22  
23 **Author Contributions:**

24 Dr. Girard and Prof. Farkas conceptualized the study, carried out the analyses, interpreted the data, drafted  
25 the initial manuscript, critically reviewed and revised the manuscript, and approved the final manuscript as  
26 submitted. All authors approved the final manuscript as submitted and agree to be accountable for all aspects  
27 of the work.  
28

29  
30 **Data Access, Responsibility, and Analysis:** Dr. Girard and Prof. Farkas had full access to all the data in the  
31 study and take responsibility for the integrity of the data and the accuracy of the data analysis.  
32

33 **Data Sharing Statement:**

34 Data is not able to be deposited in an open repository however researchers wishing to access the data may do  
35 so directly by writing a request to the Centro de Microdatos de la Facultad de Economía y Negocios de la  
36 Universidad de Chile.  
37  
38

39  
40 **Conflict of Interest Statement:** The authors have no conflicts of interest relevant to this article to disclose.  
41

42 **Financial Disclosure Statement:** The authors have no financial relationships relevant to this article to  
43 disclose.  
44

45 **Word Count: 3000**

46  
47  
48 *Key words:* Breastfeeding; Behaviour Problems; Propensity Score Matching; Epidemiology; Developmental  
49 Cohort  
50  
51  
52  
53  
54  
55  
56  
57  
58  
59  
60

## Abstract

**Importance:** Potential effects of breastfeeding on children's behaviour remains an elusive debate given inherent methodological challenges. Propensity score matching affords benefits by ensuring greater equivalence on observable social and health determinants, helping to reduce bias between groups.

**Objectives:** We examined whether duration of breastfeeding had an impact on children's externalising and internalising behaviours.

**Study Design:** A cohort study (Encuesta Longitudinal de la Primera Infancia cohort) that included 3,037 Chilean families who were enrolled in 2010. Follow-up data was collected in 2012.

**Setting:** General community.

**Participants:** Population-based sample. Eligibility criteria: children born full-term with complete data on matching variables. Matching variables included: healthcare system as a proxy of income, presence of a partner/spouse in the household, maternal age, educational level, IQ, working status, type of work, diagnosis of prenatal depression by a healthcare professional, smoking during pregnancy, delivery type, child sex, weight at birth, incubation following delivery, and child age.

**Exposure:** Duration of breastfeeding.

**Main Outcomes and Measures:** Externalising and internalising problems assessed using the Child Behaviour Checklist.

**Results:** Matched results revealed benefits of any breastfeeding, up to six months, on emotional reactivity and somatic complaints, (mean difference of -1.00, 95% CI, -1.84 to -0.16 and -1.02, 95% CI, -1.76 to -0.28, respectively). Children breastfed between 7-12 months also had reduced scores on emotional reactivity, in addition to attention problems (mean difference of -0.86, 95% CI, -1.66 to -0.06 and -0.50, 95% CI, -0.93 to -0.07, respectively). No benefits were observed for children breastfed 13 months or more.

**Conclusion:** Reduced internalising difficulties and inattention were found in children breastfed up to a year, suggesting that breastfeeding may have beneficial impacts on these areas of development. The magnitude of effect was modest. Extended durations of breastfeeding did not appear to offer any benefits.

### Article Summary:

#### Strengths:

- Use of a quasi-experimental statistical approach to match children with the propensity to be breastfed to those who were not on observable health and social determinates.
- Use of a large Chilean cohort where confounding structure differs from developed countries.
- The inclusion of 14 matching variables including maternal IQ, which is almost double the average amount of variables included in similar studies.

#### Limitations:

- No specific information was collected on full breastfeeding in this cohort restricting the study to examining duration only.
- As a result of the inclusion/exclusion criteria, the sample size was reduced from the entire cohort.

## Introduction

A considerable amount of literature supports numerous medical benefits of breastfeeding for children in reducing for example, the risk of nonspecific gastroenteritis, severe lower respiratory tract infections, atopic dermatitis, obesity, and high systolic blood pressure.<sup>1-3</sup> However, the benefits of breastfeeding on children's behavioural outcomes are less clear-cut. Differing hypotheses have been put forth regarding potential mechanisms for the perceived associations between breastfeeding and behavioural outcomes. For example, it has been suggested that breastfeeding may lead to reduced behavioural difficulties as a result of early skin-to-skin contact, when active bonding is present, helping to promote the development of a secure bond between mother and baby.<sup>(e.g.,4)</sup> This may be particularly salient in protecting against the emergence of internalising behaviours as children develop.<sup>5</sup> On the other hand, associations between breastfeeding and behavioural outcomes may be the result of the long-chain polyunsaturated fatty acids (n-3 and n-6 PUFA) found in breast milk, which arguably impact on brain development and white growth matter; an area of the brain which is typically underdeveloped in children who display with elevated levels of externalising behaviours.<sup>6-7</sup> Moreover, deficits in n-3 PUFA in particular, have been shown to increase the risk of neuronal abnormalities in studies of rats, associated with increased levels of anxiety, depression, aggression, inattention and hyperactivity.<sup>(e.g.,8-10)</sup> While the mechanisms suggested have differing implications regarding pathways of potential effects, it is important to first be able to untangle whether 'effects' exist for children's behavioural outcomes, irrespective of selection and confounding. For example, it may be possible that there is no direct mechanism through which breastfeeding is implicated in behavioural outcomes, but rather, associations found may be an artefact of maternal and family-level characteristics.

There has been mixed support for associations between breastfeeding and externalising behaviours such as conduct problems and hyperactivity<sup>(e.g.,11-16)</sup>, and internalising behaviours such as anxiety and depression<sup>(e.g., 5,17-19)</sup>, in studies from infancy to adulthood. When associations are observed, a duration of four-to-six months or longer appears to be most common. Systematic differences between studies regarding definitions of breastfeeding, classification of behaviours, timing of assessment, and statistical approaches for handling confounding and selection bias, are likely contributing factors accounting for these inconsistencies. For example, self-selection into breastfeeding has repeatedly been implicated in studies examining breastfeeding and developmental outcomes. In developed countries in particular, research continues to demonstrate characteristics common in mothers who breastfeed (e.g., lower engagement in high-risk prenatal behaviours, higher education, higher income, and older age at child birth<sup>e.g.,20-21</sup>), which are also associated with behavioural outcomes. If associations between breastfeeding and behavioural difficulties are an artefact of maternal or family characteristics, differences in statistical approaches for handling selection bias will have important consequences. Indeed, this is reflected in the literature whereby the greater the number of implicated confounders are controlled, often, the less likely significant associations remain.<sup>22</sup>

1 On the other hand, using cohorts from developing countries may provide additional insights given the  
2 differing confounding structures.<sup>23</sup> For example, notable differences between developed and developing  
3 countries regarding associated maternal characteristics were recently demonstrated in the Lancet series.<sup>21</sup>  
4 More specifically, maternal characteristics common of mothers in developing countries who breastfeed,  
5 particularly for longer durations, included poverty, lower socio-economic-status, and in some cases, lower  
6 maternal education.<sup>24-25</sup> Given this inverse association between socio-economic standing and selection into  
7 breastfeeding, replication of associations between breastfeeding and behavioural problems, may offer  
8 additional advantages in better understanding potential ‘effects’. Currently, there are a lack of studies  
9 examining breastfeeding and behavioural outcomes using nationally representative cohorts of infants in  
10 Chile, which provides such a possibility. While economic growth has been observed, social inequalities in  
11 Chile remain high, particularly for women<sup>26</sup>. Additionally, challenges in examining associations between  
12 longer durations of breastfeeding on behavioural outcomes due to low prevalence rates in many developed  
13 countries is common. In Chile, duration of breastfeeding has been steadily increasing over the past decade  
14 and was reported in 2014 at 63% of mothers who were still exclusively breastfeeding when infants were six-  
15 months of age.<sup>27</sup> Taken together, examining breastfeeding duration and behavioural outcomes with a  
16 nationally representative cohort from Chile, may offer additional benefits in our understanding.  
17  
18  
19  
20  
21  
22  
23  
24  
25  
26  
27  
28  
29

## 30 Objectives

31 To examine breastfeeding and children’s behavioural outcomes longitudinally, using a quasi-  
32 experimental statistical technique to reduce observable differences between groups, whereby attempting to  
33 address inherent limitations in observational studies. Duration of breastfeeding was examined. Moreover, we  
34 examined whether in using a Chilean cohort, we could replicate the findings of Girard et al.<sup>11-12</sup> regarding  
35 reduced hyperactivity for children breastfed, following propensity score matching, in two separate  
36 longitudinal Irish cohorts. We extend upon this work by also examining internalising behaviours. We  
37 hypothesised, in line with previous findings and recommendations of the WHO<sup>28</sup>, that children who were  
38 breastfed for a minimum of six-months would present with reduced behavioural problems in early childhood.  
39  
40  
41  
42  
43  
44  
45  
46  
47

## 48 Method

49 Participants included families enrolled in the “Encuesta Longitudinal de la Primera Infancia cohort,  
50 ELPI”, recruited in Chile in 2010 and 2012. Families recruited in the second wave (i.e., in 2012) were not  
51 considered in this study given that child outcomes were not available longitudinally. The cohort was initially  
52 recruited to better understand the sociodemographic backgrounds of children and their families alongside  
53 their physical, social, and emotional development over time. The cohort is representative of children born  
54 between January 2006 and August 2009 in urban and rural areas, across all regions of Chile.<sup>29</sup> A total of  
55  
56  
57  
58  
59



1 15,175 families with children between the ages of seven and 58-months were initially contacted for inclusion.  
2 At wave one, 14,161 families were assessed, 93.3% of the targeted sample. However, 487 children did not  
3 have information pertaining to their age and were excluded. Inclusion criteria in this study were children  
4 aged seven to 24-months, who had complete data on all confounders at wave one, and who were born full  
5 term ( $n=4,375$ ). Additionally, mothers who were still breastfeeding at wave one who had breastfed more than  
6 six, but less than 12-months, were excluded ( $n=442$ ), as it was not possible to identify whether they should  
7 be included in the group of children breastfed between seven and 12-months or in the extended breastfeeding  
8 group. This resulted in a possible sample of 3,933 children and their families, 50.6% of whom were boys  
9 ( $n=1,992$ ) at wave one. However, missing outcome data (i.e., child behaviours) at wave two in 2012, resulted  
10 in a final sample 3,037. Demographic characteristics of the included children and their families can be found  
11 in Table 1. A table comparing the entire cohort to those included can be found in the online supplement.  
12 Ethical approval was obtained from the Universidad de Chile, Centro de Microdatos. Parents/guardians were  
13 provided with oral and written information about the study and informed consent was given with completion  
14 of the first questionnaire.  
15

16 Children's behaviours were assessed using the Child Behaviour Checklist 1½-5 (CBCL)<sup>30</sup>. The  
17 CBCL 1½-5 is a parent report used to identify behaviour problems in children between the ages of one-and-  
18 a-half and five years. It is comprised of 99 items divided into subscales. The seven subscales include:  
19 emotionally reactive (9 items), anxious/depressed (8 items), somatic complaints (11 items), withdrawn (8  
20 items), sleep problems (7 items), attention problems (5 items), and aggression (19 items). Parents rate each  
21 individual behavioural item on 3-point Likert scale ranging from 0 (*not true*) to 2 (*very true or often true*),  
22 with higher scores indicative of more problematic behaviour. The CBCL 1½-5 is available in several  
23 languages, including Spanish, and has previously been validated in the literature with Chilean samples.<sup>(e.g., 31)</sup>  
24 The CBCL was collected at wave two, in 2012, when children were between the ages of 32 and 48-months.  
25 Means and standard deviations, along with correlations between subscales are presented in Table 2.  
26

27 Breastfeeding information was collected at wave one, both retrospectively and prospectively, given  
28 the unique sampling approach of recruitment of families with children between the ages of seven and 58  
29 months. Due to potential recall bias and in an attempt to create more homogeneity within mother's duration  
30 of recall, we included only families with children between seven and 24-months. Mothers were asked two  
31 questions: "was the newborn breastfed by his/her biological mother?" and "until what month was the child  
32 breastfed by his/her biological mother?" No information was collected regarding full breastfeeding in the  
33 cohort. Of the sample included, only 140 mothers/caregivers reported that the child had never been breastfed.  
34 Based on the WHO recommendations, we grouped children into one of four categories of duration; never  
35 breastfed ( $n=140$ ), breastfed up to six complete months ( $n = 1,277$ ), breastfed between seven and 12  
36 months ( $n=1,277$ ), and breastfed between 12 and 58 months ( $n=1,277$ ).  
37

complete months ( $n=1,234$ ), and breastfed  $\geq 13$  months ( $n = 1,282$ ). Each category of duration was treated as mutually exclusive, dummy coded, and compared against children who had never been breastfed.

Numerous confounders and self-selection into breastfeeding have been argued to account, at least in part, for previous associations between breastfeeding and behavioural outcomes. In the current study we matched groups on 13 of the most commonly identified factors, along with children's age given the variation in this sample. At the family level these included the category of the healthcare system that the family belonged to (public, private) as a proxy of income, and the presence of a partner/spouse in the household (yes/no). To note, the quality of services offered in the private and public healthcare system in Chile differ vastly, with higher quality services offered in the private system; subsequently translating into a high cost of belonging to the private system. Moreover, for those employed, the tier of the healthcare system in which one belongs is directly related to salary, whereby employers pay into the healthcare system on their employees behalf, which is a calculated monthly percentage deductible, based on individual income earnings. At the maternal level, confounders included maternal age, educational level (no formal education, primary, secondary, vocational training, university training, postgraduate), maternal IQ (a score of 8 or below on the Wechsler Intelligence Adult Scale, digit and vocabulary scales; WAIS,<sup>32</sup>), working status (yes/no), type of work (professional/managerial, non-manual/skilled manual, semi-skilled/unskilled, unknown/never worked), diagnosis of depression by a healthcare professional during pregnancy (yes/no), smoking during pregnancy (yes/no), and delivery type (vaginal, caesarean). To note, the WAIS has been adapted in Chile with good reported reliability and validity.<sup>33-34</sup> At the child level, four confounders were included, namely, child sex (boy/girl), weight at birth ( $\geq 2500$  grams, yes/no), whether the child was placed in an incubator after delivery (yes/no), and age at first assessment in wave 1.

### **Patient and Public Involvement**

The development of the research question and outcome measures, along with study design and recruitment to, were not directly informed by patients' priorities, experience or preference. Study findings will be disseminated to the Ministry of Labor and Social Welfare, whom were responsible for waves 1 and 2, and the Ministry of Social Development, who is currently responsible for wave 3 of the ELPI cohort, ensuring greater likelihood of dissemination to study participants.

### **Statistical Analysis**

We employed the use of propensity score matching (PSM), a statistical approach which attempts to ensure equivalence between treatment and control groups (i.e., breastfed, not breastfed), by matching groups on the most relevant factors, subsequently reducing selection bias and confounding. That is, comparisons are made between children who were breastfed and those who were not based on their measured characteristics and similar propensities for being breastfed. Nearest neighbour 1:1 models, with replacement were used. In nearest neighbour matching, groups are first randomly ordered to reduce possible bias in the matching

1 procedure, with matching then occurring sequentially. To ensure the most optimal matches between pairs on  
2 propensity scores, we imposed a caliper of a tenth of a standard deviation. That is, for a match to occur, the  
3 propensity score of a child who was breastfed to a child who was not, had to fall within a tenth of a standard  
4 deviation of one another. Matching with replacement was necessary given the low rates of children who were  
5 never breastfed. While this technique can result in larger amounts of variance, it has been argued to reduce  
6 bias by ensuring matches are of better quality.<sup>35</sup> All children fell within the area of common support which  
7 refers to cases being excluded as a result of not fitting within the specified caliper. See Figure 1 for the  
8 overlapping support of the distribution of propensity scores. To ensure the overall quality of the matching  
9 procedure, balance checks were conducted on individual confounders and the overall models. For individual  
10 factors, remaining bias ranged between 0.0 and 18.8% (see Figure 2) and the overall mean remaining bias for  
11 models ranged between 5.5% and 8.3%. It has been suggested that less than 20% remaining bias is indicative  
12 of good matching,<sup>36</sup> thus we concluded that our matching was successful. We report on the average treatment  
13 effects of those treated (ATT). All analyses were conducted using Stata v14 software. We use the term  
14 significant henceforth to denote statistical significance, using a threshold of  $p < .05$ .

## 25 Results

26 Comparing children never breastfed to those who were breastfed up to six months inclusive,  
27 significant differences in favour of those who were breastfed were found on two of the behavioural subscales  
28 (i.e., emotionally reactive and somatic complaints). These results remained significant following matching  
29 whereby children who were breastfed had lower scores on these subscales (i.e., a mean difference of -1.00,  $d$   
30 = -0.23 and -1.02,  $d$  = -0.27 respectively). Comparing children who were never breastfed to those breastfed  
31 between seven and 12 months inclusive, significant differences were found prior to matching on all subscales  
32 with the exception of anxious/depressed and sleep problems. After matching, significant differences  
33 remained for emotional reactivity and attention problems only (i.e., a mean difference of -0.86,  $d$  = -0.21 and  
34 -0.50,  $d$  = -0.22, respectively), with reduced difficulties for children who were breastfed. Comparing those  
35 never breastfed to the extended group (i.e., 13 months or more), pre-matching results were similar to the first  
36 model with lower scores on the emotionally reactive and somatic complaints subscales. Post matching  
37 revealed no remaining significant differences between groups. All results can be found in Table 3.

## 49 Discussion

50 While causality remains an ongoing debate, owing to the ethical constraints of conducting RCTs, our  
51 results add to the emerging corpus of literature trying to untangle the 'effects' of breastfeeding on  
52 behavioural outcomes by using a PSM approach in a Chilean cohort. Given the knowledge of family and  
53 maternal characteristics commonly observed of children who are breastfed, the use of matching helps to  
54 ensure that differences between groups on these observable characteristics are significantly minimised, so  
55

1 that the propensity to be breastfed across groups is arguably comparable. As a result, only post-matching  
2 results are discussed. Due to exclusions, our results have implications only for children who were born full  
3 term.  
4

5  
6 The results suggest that breastfeeding may be an effective low-cost early investment for reducing  
7 difficulties with emotional reactivity and somatic complaints, in addition to attention problems experienced  
8 in early childhood; all of which are indicative of neurodevelopmental difficulties. Duration appears to be an  
9 important factor implicated in these associations. For example, results revealed that any breastfeeding during  
10 the first six months, and up to 12 full months, contributed to reductions in children's difficulties with  
11 emotional reactivity and somatic complaints up to four years of age. In comparison, a minimum of at least six  
12 full months or more of breastfeeding was required for observed benefits related to attention problems at the  
13 same age. This latter finding is in line with findings from Girard et al.,<sup>11</sup> who also used PSM in a nationally  
14 representative sample of infants from Ireland. The similar results found around three years of age, across  
15 these two unique cohorts, whilst using PSM, demonstrates favourable support for a direct mechanism  
16 between breastfeeding and reduced attention problems in early childhood, rather than confounding per se.  
17  
18 Worth noting is the link found between inattention/hyperactivity, regulation difficulties and mood  
19 disorders<sup>37</sup>, and their link with deficiencies in arachidonic acid and docosahexaenoic acid.<sup>37</sup> Given the types  
20 of behaviours where reductions for those breastfed are found in this study, and in the context of previous  
21 studies (e.g.,<sup>8-10, 37-38</sup>), a plausible hypothesis might be that of the nutrients found in breastmilk contributing to  
22 the growing infant's brain development. More research in this area, using well-designed and rigorously  
23 sound methodology is first needed before firm conclusions can be drawn.  
24

25  
26 While our results suggest statistically significant differences in favour of children who were breastfed  
27 at least six full months (and up until 12 full months), as compared to those who were never breastfed on  
28 emotional reactivity, somatic complaints, and inattention, the magnitude of effect for each behaviour was  
29 found to be small (i.e., Cohen's  $d = < .30$ ). The practical and clinical significance of our results is arguably  
30 interpretable in the eye of the 'stakeholder'. A small reduction in a child's emotional reactivity, somatic  
31 complaints, and/or inattention in everyday situations may carry greater importance to a first-time or  
32 multiparous mother experiencing high levels of stress and fatigue as a result of limited financial and/or  
33 personal resources. On the other hand, within a clinical context, the effect sizes found may be perceived as  
34 carrying less practical importance.  
35

36  
37 Conversely, no benefits of extended breastfeeding were found on children's internalising or  
38 externalising behavioural problems. This may suggest a non-linear dose-response effect of breastfeeding on  
39 behaviour, similar to previous findings. (e.g.,<sup>12</sup>) While the recommendations put forth by the WHO for  
40 continued partial breastfeeding up to two years of age or more for the physical health and growth of infants  
41 has been suggested, we observed no additional benefits of extended breastfeeding on behavioural problems in  
42  
43  
44  
45  
46  
47  
48  
49  
50  
51  
52  
53  
54  
55  
56  
57  
58  
59

1 this sample. These findings do not however contradict these recommendations regarding the many afforded  
2 medical benefits of extended durations of breastfeeding. Of interest and as can be seen in Table 1, mothers  
3 who breastfed for extended durations in Chile had similar characteristics to mothers who had never breastfed,  
4 lending to poorer quality matching. For example, in both the never- and extended breastfeeding groups, a  
5 significantly higher proportion of mothers had never worked, were in the public tier of the health system, had  
6 only completed education at the primary level and had below average scores on both the digit and vocabulary  
7 scales of the WAIS; factors which when previously controlled, have reduced observed associations between  
8 breastfeeding and children's cognitive and behavioural development outcomes. While a non-linear dose-  
9 response hypothesis is plausible, these findings also likely support what is already known. Maternal  
10 characteristics contribute to children's behavioural outcomes and the nutrients alone found in breastmilk may  
11 be only part of the story. Moreover, it supports the differences in confounding structures of breastfeeding in  
12 developing and developed countries.<sup>21,23</sup>

21 Notable strengths of this study include the use of the largest nationally representative cohort of  
22 Chilean children to date, where self-selection and confounding structures differ from developed countries,  
23 whilst utilising PSM, with a large number of matching confounders to reduce differences across groups, of  
24 which included maternal IQ. Despite these strengths, notable limitations must be mentioned. While  
25 information on necessary supplementation was asked, there was no specific information regarding full  
26 breastfeeding, limiting our ability to examine its impact. This is an important issue given the differences in  
27 feeding experiences and the potential for dilution of effects from breastfeeding to behaviour. In the same  
28 vein, no information regarding direct breastfeeding versus expressed breast milk was collected; information  
29 which may help in better understanding pathways of effect. Due to our inclusion/exclusion criteria, the  
30 sample size was significantly reduced, with some statistically significant differences between the originally  
31 recruited cohort and those included in the current study, indicative of potential selection bias. Thus,  
32 warranting replication. Additionally, despite the benefits afforded by PSM techniques, matching is only  
33 possible on observable characteristics. While we were able to include a multitude of health and social  
34 confounders, including maternal IQ, it remains possible that unobservable characteristics contribute to the  
35 associations. Relatedly, the quality of matching for the extended breastfeeding families as compared to the  
36 never breastfeeding families was not as successful compared to the matching between the other groups, due  
37 to the initial similarities on health and social factors. The included covariates used for matching were  
38 theoretically motivated and thus, we kept the integrity of matching variables intact across all models.  
39 However, the findings from this model (i.e., the extended breastfeeding families) warrants caution in  
40 interpretation. Future studies are needed to more carefully evaluate extended breastfeeding and potential  
41 associations with behavioural outcomes, in the context of differing confounding structure. Finally, shared  
42  
43  
44  
45  
46  
47  
48  
49  
50  
51  
52  
53  
54  
55  
56  
57  
58  
59



method variance is a concern given that parent reports were used to collect information on both breastfeeding duration and child behaviours.

Despite these limitations, and in the context of the strengths of this study, we believe these results contribute important findings, namely more support for the potential of ‘causal paths’. A comprehensive answer to the question of effects on psychosocial development remains unanswered without the use of RCTs. However, with replication across regions, whilst using more stringent methodological approaches to help in reducing bias inherent in observational studies, promise for better understanding of potential mechanisms is viable.

## References

1. Horta BL, Loret de Mola C, Victora CG. Long-term consequences of breastfeeding on cholesterol, obesity, systolic blood pressure and type 2 diabetes: a systematic review and meta-analysis. *Acta Paediatrica*. 2015 Dec 1;104(S467):30-7.
2. Ip S, Chung M, Raman G, Trikalinos TA, Lau J. A summary of the Agency for Healthcare Research and Quality's evidence report on breastfeeding in developed countries. *Breastfeeding Medicine*. 2009 Oct 1;4(S1):S-17.
3. Taylor, J. S., Kacmar, J. E., Nothnagle, M., & Lawrence, R. A. (2005). A systematic review of the literature associating breastfeeding with type 2 diabetes and gestational diabetes. *Journal of the American College of Nutrition*, 24(5), 320-326. doi:10.1080/07315724.2005.10719480.
4. Britton, J. R., Britton, H. L., & Gronwaldt, V. (2006). Breastfeeding, sensitivity, and attachment. *Pediatrics*, 118(5), e1436-e1443. doi:10.1542/peds.2005-2916.
5. Liu J, Leung P, Yang A. Breastfeeding and active bonding protects against children's internalizing behavior problems. *Nutrients*. 2013 Dec 24;6(1):76-89.
6. Sarkar S, Craig MC, Catani M, Dell'Acqua F, Fahy T, Deeley Q, Murphy DG. Frontotemporal white-matter microstructural abnormalities in adolescents with conduct disorder: a diffusion tensor imaging study. *Psychological Medicine*. 2013 Feb;43(2):401-11.
7. Silk TJ, Vance A, Rinehart N, Bradshaw JL, Cunnington R. White-matter abnormalities in attention deficit hyperactivity disorder: a diffusion tensor imaging study. *Human Brain Mapping*. 2009 Sep 15;30(9):2757-65.
8. DeMar JC, Ma K, Bell JM, Igarashi M, Greenstein D, Rapoport SI. One generation of n-3 polyunsaturated fatty acid deprivation increases depression and aggression test scores in rats. *Journal of Lipid Research*. 2006 Jan 1;47(1):172-80.
9. Fedorova I, Alvheim AR, Hussein N, Salem Jr N. Deficit in prepulse inhibition in mice caused by dietary n-3 fatty acid deficiency. *Behavioral Neuroscience*. 2009 Dec;123(6):1218.

10. Janssen CI, Kiliaan AJ. Long-chain polyunsaturated fatty acids (LCPUFA) from genesis to senescence: the influence of LCPUFA on neural development, aging, and neurodegeneration. *Progress in Lipid Research*. 2014 Jan 31;53:1-7.
11. Girard LC, Doyle O, Tremblay RE. Breastfeeding, cognitive and noncognitive development in early childhood: a population study. *Pediatrics*. 2017 Mar 27:e20161848.
12. Girard LC, Doyle O, Tremblay RE. Breastfeeding and externalising problems: a quasi-experimental design with a national cohort. *European Child & Adolescent Psychiatry*. 2017 Nov 24:1-8.
13. Lind JN, Li R, Perrine CG, Schieve LA. Breastfeeding and later psychosocial development of children at 6 years of age. *Pediatrics*. 2014 Sep 1;134(Supplement 1):S36-41.
14. Belfort MB, Rifas-Shiman SL, Kleinman KP, Bellinger DC, Harris MH, Taveras EM, Gillman MW, Oken E. Infant breastfeeding duration and mid-childhood executive function, behavior, and social-emotional development. *Journal of Developmental and Behavioral Pediatrics: JDBP*. 2016 Jan;37(1):43.
15. Oddy WH, Li J, Robinson M, Whitehouse AJ. The long-term effects of breastfeeding on development. *Contemporary Pediatrics*. 2012. InTech.
16. Poton WL, Soares AL, Oliveira ER, Gonçalves H. Breastfeeding and behavior disorders among children and adolescents: a systematic review. *Revista de saude publica*. 2018 Feb 5;52:9.
17. de Mola CL, Horta BL, Gonçalves H, de Avila Quevedo L, Pinheiro R, Gigante DP, dos Santos Motta JV, Barros FC. Breastfeeding and mental health in adulthood: A birth cohort study in Brazil. *Journal of Affective Disorders*. 2016 Sep 15;202:115-9.
18. Fergusson DM, Woodward LJ. Breast feeding and later psychosocial adjustment. *Paediatric and perinatal epidemiology*. 1999 Apr 1;13(2):144-57.
19. Kwok MK, Leung GM, Schooling CM. Breast feeding and early adolescent behaviour, self-esteem and depression: Hong Kong's 'Children of 1997' birth cohort. *Archives of Disease in Childhood*. 2013 Nov 1;98(11):887-94.
20. Girard LC, Côté SM, de Lauzon-Guillain B, Dubois L, Falissard B, Forhan A, Doyle O, Bernard JY, Heude B, Saurel-Cubizolles MJ, Kaminski M. Factors associated with breastfeeding initiation: a comparison between France and French-speaking Canada. *PloS One*. 2016 Nov 30;11(11):e0166946.
21. Victora CG, Bahl R, Barros AJ, França GV, Horton S, Krasevec J, Murch S, Sankar MJ, Walker N, Rollins NC. Breastfeeding in the 21st century: epidemiology, mechanisms, and lifelong effect. *The Lancet*. 2016 Feb 5;387(10017):475-90.
22. Walfisch A, Sermer C, Cressman A, Koren G. Breast milk and cognitive development—the role of confounders: a systematic review. *BMJ Open*. 2013 Aug 1;3(8):e003259.
23. Brion MJ, Lawlor DA, Matijasevich A, Horta B, Anselmi L, Araújo CL, Menezes AM, Victora CG, Smith GD. What are the causal effects of breastfeeding on IQ, obesity and blood pressure? Evidence from comparing high-income with middle-income cohorts. *International Journal of Epidemiology*. 2011 Feb 24;40(3):670-80.



24. Lutter CK, Chaparro CM, Grummer-Strawn LM. Increases in breastfeeding in Latin America and the Caribbean: an analysis of equity. *Health Policy and Planning*. 2010 Sep 28;26(3):257-65.
25. Pérez-Escamilla R. Breastfeeding and the nutritional transition in the Latin American and Caribbean Region: a success story? *Cadernos de Saude Publica*. 2003 Jan;19:S119-27.
26. OCED. OCED economic surveys Chile. 2015. Retrieved from <http://www.oecd.org/eco/surveys/Chile-2015-overview.pdf>, 15 September 2018.
27. UNICEF. Estado mundial de la infancia 2014 en cifras [World state of infancy 2014 in numbers]. 2014. Retrieved from <https://www.unicef.org/spanish/sowc2014/numbers/>, 05 February 2018.
28. World Health Organization, & UNICEF. Global strategy for infant and young child feeding. *Geneva, Switzerland: World Health Organization Press*. 2003.
29. Bravo D. Encuesta Longitudinal de la Primera Infancia. Centro Micro Datos Departamento Economía Universidad de Chile[Links]. 2012.
30. Achenbach, T.M., & Rescorla, L.A. Manual for the ASEBA School-Age Forms & Profiles. Burlington, VT: University of Vermont, Research Center for Children, Youth, & Families. 2001.
31. Ivanova MY, Achenbach TM, Rescorla LA, Harder VS, Ang RP, Bilenberg N, Bjarnadottir G, Capron C, De Pauw SS, Dias P, Dobrean A. Preschool psychopathology reported by parents in 23 societies: testing the seven-syndrome model of the child behavior checklist for ages 1.5–5. *Journal of the American Academy of Child & Adolescent Psychiatry*. 2010 Dec 1;49(12):1215-24.
32. Wechsler, D. The measurement of adult intelligence. Baltimore, MD: William and Wilkins. 1939.
33. Berdicewski O, Herreros R. Normas de adaptación WAIS a Chile (Doctoral dissertation, Tesis de Grado no publicada), Universidad de Chile, Santiago, Chile. 1960.
34. Hermosilla, M. La Escala de Inteligencia de Wechsler para adultos [Wechsler intelligence scale for adults] (unpublished manuscript). Escuela de Psicología, Pontificia Universidad Católica de Chile, Santiago, Chile. 1982.
35. Caliendo M, Kopeinig S. Some practical guidance for the implementation of propensity score matching. *Journal of Economic Surveys*. 2008 Feb 1;22(1):31-72.
36. Rosenbaum PR, Rubin DB. The bias due to incomplete matching. *Biometrics*. 1985;41(1):103–116.
37. Hirshfeld-Becker DR, Biederman J, Faraone SV, Violette H, Wrightsman J, Rosenbaum JF. Temperamental correlates of disruptive behavior disorders in young children: preliminary findings. *Biological Psychiatry*. 2002 Apr 1;51(7):563-74.
38. Richardson AJ. Omega-3 fatty acids in ADHD and related neurodevelopmental disorders. *International Review of Psychiatry*. 2006 Jan 1;18(2):155-72.

**Table 1:** Family, maternal, infant, and medical characteristics: Infant cohort between 7 and 24 months

|                                                   | Never<br>breastfeed<br>(n=140) | 1-6 months<br>(n=1277) | 7-12 months<br>(n=1234) | 13 months or<br>more<br>(n=1282) | <i>p</i>  |
|---------------------------------------------------|--------------------------------|------------------------|-------------------------|----------------------------------|-----------|
| <b>Resident spouse/partner (yes)</b>              | 90 (64.3)                      | 851 (66.6)             | 859 (69.6)              | 891 (69.5)                       | <i>ns</i> |
| <b>Social class</b>                               |                                |                        |                         |                                  | ≤ .001    |
| Professional/managerial                           | 8 (5.7)                        | 111 (8.7)              | 98 (7.9)                | 116 (9.0)                        |           |
| Non-manual/skilled manual                         | 50 (35.7)                      | 512 (40.1)             | 487 (39.5)              | 355 (27.7)                       |           |
| Semiskilled/unskilled                             | 5 (3.6)                        | 33 (2.6)               | 23 (1.9)                | 34 (2.7)                         |           |
| Never worked                                      | 77 (55.0)                      | 621 (48.6)             | 626 (50.7)              | 777 (60.6)                       |           |
| <b>Health provisional system</b>                  |                                |                        |                         |                                  | ≤ .001    |
| Public system                                     | 127 (90.7)                     | 1107 (86.7)            | 1069 (86.6)             | 1205 (94.0)                      |           |
| Private system                                    | 13 (9.3)                       | 170 (13.3)             | 165 (13.4)              | 77 (6.0)                         |           |
| <b>Maternal education</b>                         |                                |                        |                         |                                  | ≤ .001    |
| No formal education                               | 0 (0)                          | 3 (0.2)                | 4 (0.3)                 | 7 (0.5)                          |           |
| Primary complete                                  | 26 (18.6)                      | 155 (12.1)             | 154 (12.5)              | 279 (21.8)                       |           |
| Secondary complete                                | 59 (42.1)                      | 491 (38.4)             | 483 (39.1)              | 544 (42.4)                       |           |
| Vocational training                               | 42 (30.0)                      | 441 (34.5)             | 392 (31.8)              | 347 (27.1)                       |           |
| University training                               | 13 (9.3)                       | 163 (12.8)             | 176 (14.3)              | 86 (6.7)                         |           |
| Postgraduates studies                             | 0 (0)                          | 13 (1.0)               | 17 (1.4)                | 7 (0.5)                          |           |
| Unknown                                           | 0 (0)                          | 11 (0.9)               | 8 (0.6)                 | 12 (0.9)                         |           |
| <b>Maternal working status (yes)</b>              | 51 (36.4)                      | 533 (41.7)             | 505 (40.9)              | 407 (31.7)                       | ≤ .001    |
| <b>Maternal age</b>                               |                                |                        |                         |                                  | ≤ .001    |
| ≤ 24                                              | 66 (47.1)                      | 524 (41.0)             | 425 (34.4)              | 485 (37.8)                       |           |
| 25-29                                             | 21 (15.0)                      | 294 (23.0)             | 311 (25.2)              | 258 (20.1)                       |           |
| 30-34                                             | 27 (19.3)                      | 239 (18.7)             | 284 (23.0)              | 265 (20.7)                       |           |
| ≥ 35                                              | 26 (18.6)                      | 220 (17.2)             | 214 (17.3)              | 274 (21.4)                       |           |
| <b>Maternal IQ</b>                                |                                |                        |                         |                                  | ≤ .001    |
| WAIS digit (below average)                        | 103 (73.6)                     | 825 (64.6)             | 768 (62.2)              | 918 (71.6)                       | ≤ .001    |
| WAIS vocabulary (below average)                   | 73 (52.1)                      | 534 (41.8)             | 502 (40.7)              | 671 (52.3)                       | ≤ .001    |
| <b>Maternal depression during pregnancy (yes)</b> | 23 (16.4)                      | 178 (13.9)             | 185 (15.0)              | 188 (14.7)                       | <i>ns</i> |
| <b>Smoking during pregnancy (yes)</b>             | 19 (13.6)                      | 141 (11.0)             | 101 (8.2)               | 151 (11.8)                       | .011      |
| <b>Alcohol use during pregnancy (yes)</b>         | 14 (10.0)                      | 96 (7.5)               | 77 (6.2)                | 96 (7.5)                         | <i>ns</i> |
| <b>Drugs use during pregnancy (yes)</b>           | 4 (2.9)                        | 7 (0.5)                | 8 (0.6)                 | 10 (0.8)                         | .025      |
| <b>Delivery mode (caesarean)</b>                  | 72 (51.4)                      | 606 (47.5)             | 578 (46.8)              | 503 (39.2)                       | ≤ .001    |
| <b>Birth weight (≥2500g, yes)</b>                 | 11 (7.9)                       | 34 (2.7)               | 30 (2.4)                | 28 (2.2)                         | .001      |
| <b>Stay in incubator (yes)</b>                    | 12 (8.6)                       | 46 (3.6)               | 44 (3.6)                | 49 (3.8)                         | .030      |
| <b>Infant sex (boy)</b>                           | 67 (47.9)                      | 658 (51.5)             | 637 (51.6)              | 630 (49.1)                       | <i>ns</i> |

Note: The health provisional system was used as a proxy for the financial status of the family, whereby families in the private system are generally of higher income. Maternal IQ was assessed using both the digit and vocabulary scales of the Wechsler Intelligence Adult Scale, WAIS (Wechsler, 1939). A below average score is defined as a score of 8 or below on the digit and vocabulary scales.

**Table 2:** Bivariate Correlations and Means (Standard Deviations) of Children's Behaviours

|                      | Emotionally<br>reactive | Anxious/<br>depressed | Somatic<br>complaints | Withdrawn | Sleep<br>problems | Attention<br>problems | Aggressive |
|----------------------|-------------------------|-----------------------|-----------------------|-----------|-------------------|-----------------------|------------|
| Emotionally reactive |                         |                       |                       |           |                   |                       |            |
| Anxious/depressed    | .650**                  |                       |                       |           |                   |                       |            |
| Somatic complaints   | .549**                  | .499**                |                       |           |                   |                       |            |
| Withdrawn            | .569**                  | .548**                | .435**                |           |                   |                       |            |
| Sleep problems       | .445**                  | .404**                | .373**                | .350**    |                   |                       |            |
| Attention problems   | .428**                  | .374**                | .319**                | .345**    | .341**            |                       |            |
| Aggressive           | .664**                  | .542**                | .409**                | .496**    | .477**            | .619**                |            |
| Mean                 | 3.11                    | 4.33                  | 3.10                  | 2.92      | 2.83              | 3.72                  | 13.68      |
| Standard deviation   | 2.94                    | 3.01                  | 2.63                  | 2.38      | 2.62              | 1.97                  | 8.35       |
| Min-Max              | 0 - 18                  | 0 - 16                | 0 - 22                | 0 - 16    | 0 - 14            | 0 - 10                | 0 - 38     |

Note: \*\* denotes statistical significance at the 0.01 level.

**Table 3: Breastfeeding and Children's Behavioural Problems: Pre and Post Matching Results**

| Up to 6 months                 | Pre Matching |       |                 |      | Post Matching |       |                |      |
|--------------------------------|--------------|-------|-----------------|------|---------------|-------|----------------|------|
|                                | T            | C     | Diff (Sig.)     | S.E  | T             | C     | Diff (Sig.)    | S.E  |
| Emotionally reactive           | 3.16         | 3.98  | <b>-0.81**</b>  | 0.30 | 3.16          | 4.17  | <b>-1.00*</b>  | 0.43 |
| Anxious/depressed              | 4.38         | 4.67  | -0.29           | 0.29 | 4.38          | 4.59  | -0.21          | 0.39 |
| Somatic complaints             | 3.09         | 3.73  | <b>-0.64*</b>   | 0.25 | 3.09          | 4.11  | <b>-1.02**</b> | 0.38 |
| Withdrawn                      | 3.00         | 3.16  | -0.15           | 0.24 | 3.00          | 3.15  | -0.15          | 0.31 |
| Sleep problems                 | 2.86         | 3.07  | -0.20           | 0.26 | 2.86          | 3.40  | -0.53          | 0.36 |
| Attention problems             | 3.79         | 4.05  | -0.26           | 0.19 | 3.79          | 3.85  | -0.06          | 0.22 |
| Aggression                     | 13.91        | 14.90 | -0.98           | 0.85 | 13.91         | 14.65 | -0.74          | 1.18 |
| <b>Between 7 and 12 months</b> |              |       |                 |      |               |       |                |      |
| Emotionally reactive           | 2.85         | 3.98  | <b>-1.12***</b> | 0.29 | 2.85          | 3.71  | <b>-0.86*</b>  | 0.41 |
| Anxious/depressed              | 4.12         | 4.67  | -0.54           | 0.30 | 4.12          | 4.39  | -0.26          | 0.39 |
| Somatic complaints             | 2.95         | 3.73  | <b>-0.78**</b>  | 0.26 | 2.95          | 3.65  | -0.70          | 0.37 |
| Withdrawn                      | 2.70         | 3.16  | <b>-0.45*</b>   | 0.22 | 2.70          | 3.06  | -0.36          | 0.30 |
| Sleep problems                 | 2.68         | 3.07  | -0.38           | 0.26 | 2.68          | 2.93  | -0.25          | 0.35 |
| Attention problems             | 3.57         | 4.05  | <b>-0.48*</b>   | 0.19 | 3.57          | 4.07  | <b>-0.50*</b>  | 0.22 |
| Aggression                     | 13.02        | 14.90 | <b>-1.87*</b>   | 0.81 | 13.02         | 13.85 | -0.83          | 1.16 |
| <b>13 months or more</b>       |              |       |                 |      |               |       |                |      |
| Emotionally reactive           | 3.20         | 3.98  | <b>-0.77*</b>   | 0.30 | 3.20          | 3.66  | -0.45          | 0.48 |
| Anxious/depressed              | 4.42         | 4.67  | -0.24           | 0.31 | 4.42          | 4.53  | -0.10          | 0.43 |
| Somatic complaints             | 3.18         | 3.73  | <b>-0.55*</b>   | 0.27 | 3.18          | 3.43  | -0.25          | 0.42 |
| Withdrawn                      | 3.01         | 3.16  | -0.15           | 0.24 | 3.01          | 3.17  | -0.16          | 0.34 |
| Sleep problems                 | 2.92         | 3.07  | -0.15           | 0.27 | 2.92          | 2.65  | 0.26           | 0.40 |
| Attention problems             | 3.76         | 4.05  | -0.29           | 0.20 | 3.76          | 3.77  | -0.01          | 0.24 |
| Aggression                     | 13.91        | 14.90 | -0.98           | 0.86 | 13.91         | 12.44 | 1.46           | 1.32 |

Note: \*\*\* denotes significance at the  $p = < .001$  level, \*\* at the .01 level, \* at the .05 level. T denotes 'treatment' (breastfed) and C denotes 'control' (not breastfed). 'Diff' represents the difference in scores between groups. S.E. refers to the standard errors. For being breastfed up to 6 months: N for the treatment group was 949 and 110 for the control group. For being breastfed between 7 and 12 months: N for the treatment group was 946 and 110 for the control group. For being breastfed 13 months or more: N for the treatment group was 1,006 and 110 for the control group.

### Figure 1: Overlapping Support: Distribution of Propensity Scores

Note: Treated refers to children who were breastfed, untreated refers to children who were not. For being breastfed up to 6 months: N for the treatment group was 949 and 110 for the control group. For being

1 breastfed between 7 and 12 months: N for the treatment group was 946 and 110 for the control group. For  
2 being breastfed 13 months or more: N for the treatment group was 1,006 and 110 for the control group.  
3

4 **Figure 2: Standardised Differences across Covariates: Pre and Post Matching**

5 Note: Treated refers to children who were breastfed, untreated refers to children who were not. For being  
6 breastfed up to 6 months: N for the treatment group was 949 and 110 for the control group. For being  
7 breastfed between 7 and 12 months: N for the treatment group was 946 and 110 for the control group. For  
8 being breastfed 13 months or more: N for the treatment group was 1,006 and 110 for the control group.  
9

10  
11  
12  
13  
14  
15  
16  
17  
18  
19  
20  
21  
22  
23  
24  
25  
26  
27  
28  
29  
30  
31  
32  
33  
34  
35  
36  
37  
38  
39  
40  
41  
42  
43  
44  
45  
46  
47  
48  
49  
50  
51  
52  
53  
54  
55  
56  
57  
58  
59  
60

For peer review only

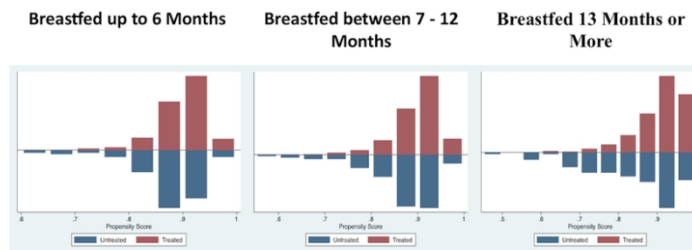

Figure 1: Overlapping Support: Distribution of Propensity Scores

Note: Treated refers to children who were breastfed, untreated refers to children who were not. For being breastfed up to 6 months: N for the treatment group was 949 and 110 for the control group. For being breastfed between 7 and 12 months: N for the treatment group was 946 and 110 for the control group. For being breastfed 13 months or more: N for the treatment group was 1,006 and 110 for the control group.

99x56mm (300 x 300 DPI)



Figure 2: Standardised Differences across Covariates: Pre and Post Matching.

Note: Treated refers to children who were breastfed, untreated refers to children who were not. For being breastfed up to 6 months: N for the treatment group was 949 and 110 for the control group. For being breastfed between 7 and 12 months: N for the treatment group was 946 and 110 for the control group. For being breastfed 13 months or more: N for the treatment group was 1,006 and 110 for the control group.

99x56mm (300 x 300 DPI)

## Online Supplement 1

## Family, maternal, infant, and medical characteristics: A comparison between the Entire and Included Cohort

|                                            | Entire Cohort<br>N = 14,161 (%) | Included Families<br>N = 3,933 (%) | <i>p</i>  |
|--------------------------------------------|---------------------------------|------------------------------------|-----------|
| Resident spouse/partner (yes)              | 6,873 (69.2%)                   | 2,691 (68.4%)                      | <i>ns</i> |
| Social class                               |                                 |                                    | ≤ .001    |
| Professional/managerial                    | 968 (9.7%)                      | 333 (8.5%)                         |           |
| Non-manual/skilled manual                  | 3,812 (38.4%)                   | 1,404 (35.7%)                      |           |
| Semi-skilled/unskilled                     | 374 (3.8%)                      | 95 (2.4%)                          |           |
| Never worked                               | 4,779 (48.1%)                   | 2,101 (53.4%)                      |           |
| Health provisional system                  |                                 |                                    | <i>ns</i> |
| Public system                              | 8,820 (88.8%)                   | 3,508 (89.2%)                      |           |
| Private system                             | 1,113 (11.2%)                   | 425 (10.8%)                        |           |
| Maternal education                         |                                 |                                    | <i>ns</i> |
| No formal education                        | 37 (0.4%)                       | 14 (0.4%)                          |           |
| Primary complete                           | 1,743 (17.7%)                   | 614 (15.7%)                        |           |
| Secondary Complete                         | 3,917 (39.8%)                   | 1,577 (40.4%)                      |           |
| Vocational training                        | 2,984 (30.3%)                   | 1,222 (31.3%)                      |           |
| University training                        | 1,075 (10.9%)                   | 438 (11.2%)                        |           |
| Postgraduate studies                       | 81 (0.8%)                       | 37 (0.9%)                          |           |
| Maternal working status (yes)              | 4,366 (44.0%)                   | 1,496 (38.0%)                      | ≤ .001    |
| Maternal age                               |                                 |                                    | ≤ .001    |
| ≤ 24                                       | 2,806 (28.2%)                   | 1,500 (38.1%)                      |           |
| 25-29                                      | 2,250 (22.7%)                   | 884 (22.5%)                        |           |
| 30-34                                      | 2,173 (21.9%)                   | 815 (20.7%)                        |           |
| ≥ 35                                       | 2,704 (27.2%)                   | 734 (18.7%)                        |           |
| Maternal depression during pregnancy (yes) | 1,027 (10.3%)                   | 574 (14.6%)                        | ≤ .001    |
| Smoking during pregnancy (yes)             | 978 (9.9%)                      | 412 (10.5%)                        | <i>ns</i> |
| Alcohol use during pregnancy (yes)         | 705 (7.1%)                      | 283 (7.2%)                         | <i>ns</i> |
| Drug use during pregnancy (yes)            | 81 (0.8%)                       | 29 (0.7%)                          | <i>ns</i> |
| Delivery mode (caesarean)                  | 4,314 (43.5%)                   | 1,759 (44.7%)                      | <i>ns</i> |
| Birth weight (≥ 2500g, yes)                | 205 (2.3%)                      | 103 (2.6%)                         | <i>ns</i> |
| Stay in incubator (yes)                    | 433 (4.4%)                      | 151 (3.8%)                         | <i>ns</i> |
| Infant sex (boy)                           | 5,004 (50.4%)                   | 1,992 (50.6%)                      | <i>ns</i> |



1  
2  
3  
4  
5  
6  
7  
8  
9  
10  
11  
12  
13  
14  
15  
16  
17  
18  
19  
20  
21  
22  
23  
24  
25  
26  
27  
28  
29  
30  
31  
32  
33  
34  
35  
36  
37  
38  
39  
40  
41  
42  
43  
44  
45  
46  
47  
48  
49  
50  
51  
52  
53  
54  
55  
56  
57  
58  
59  
60

## STROBE Statement—checklist of items that should be included in reports of observational studies

|                              | Item No | Recommendation                                                                                                                                                                                                                                                                                                                                                                                                                                                                                                                                                                                                                                                                                                                                                |
|------------------------------|---------|---------------------------------------------------------------------------------------------------------------------------------------------------------------------------------------------------------------------------------------------------------------------------------------------------------------------------------------------------------------------------------------------------------------------------------------------------------------------------------------------------------------------------------------------------------------------------------------------------------------------------------------------------------------------------------------------------------------------------------------------------------------|
| <b>Title and abstract</b>    | 1       | (a) Indicate the study's design with a commonly used term in the title or the abstract: <b>In both, Pgs. 1 and 2.</b><br>(b) Provide in the abstract an informative and balanced summary of what was done and what was found <b>Pg. 2.</b>                                                                                                                                                                                                                                                                                                                                                                                                                                                                                                                    |
| <b>Introduction</b>          |         |                                                                                                                                                                                                                                                                                                                                                                                                                                                                                                                                                                                                                                                                                                                                                               |
| Background/rationale         | 2       | Explain the scientific background and rationale for the investigation being reported <b>Pgs. 3-4</b>                                                                                                                                                                                                                                                                                                                                                                                                                                                                                                                                                                                                                                                          |
| Objectives                   | 3       | State specific objectives, including any prespecified hypotheses. <b>Pg. 4</b>                                                                                                                                                                                                                                                                                                                                                                                                                                                                                                                                                                                                                                                                                |
| <b>Methods</b>               |         |                                                                                                                                                                                                                                                                                                                                                                                                                                                                                                                                                                                                                                                                                                                                                               |
| Study design                 | 4       | Present key elements of study design early in the paper <b>Pgs. 4-5.</b>                                                                                                                                                                                                                                                                                                                                                                                                                                                                                                                                                                                                                                                                                      |
| Setting                      | 5       | Describe the setting, locations, and relevant dates, including periods of recruitment, exposure, follow-up, and data collection <b>Pgs. 4-5.</b>                                                                                                                                                                                                                                                                                                                                                                                                                                                                                                                                                                                                              |
| Participants                 | 6       | (a) <i>Cohort study</i> —Give the eligibility criteria, and the sources and methods of selection of participants. Describe methods of follow-up <b>Pg. 5</b><br><i>Case-control study</i> —Give the eligibility criteria, and the sources and methods of case ascertainment and control selection. Give the rationale for the choice of cases and controls<br><i>Cross-sectional study</i> —Give the eligibility criteria, and the sources and methods of selection of participants<br>(b) <i>Cohort study</i> —For matched studies, give matching criteria and number of exposed and unexposed <b>Pgs. 5-6. + Table 3 and Figures 1 and 2.</b><br><i>Case-control study</i> —For matched studies, give matching criteria and the number of controls per case |
| Variables                    | 7       | Clearly define all outcomes, exposures, predictors, potential confounders, and effect modifiers. Give diagnostic criteria, if applicable <b>Pgs. 5-7 + Figure 2.</b>                                                                                                                                                                                                                                                                                                                                                                                                                                                                                                                                                                                          |
| Data sources/<br>measurement | 8*      | For each variable of interest, give sources of data and details of methods of assessment (measurement). Describe comparability of assessment methods if there is more than one group <b>Pgs. 5-6.</b>                                                                                                                                                                                                                                                                                                                                                                                                                                                                                                                                                         |
| Bias                         | 9       | Describe any efforts to address potential sources of bias <b>Pgs. 6-7 + Figure 2</b>                                                                                                                                                                                                                                                                                                                                                                                                                                                                                                                                                                                                                                                                          |
| Study size                   | 10      | Explain how the study size was arrived at <b>Pgs. 4-5.</b>                                                                                                                                                                                                                                                                                                                                                                                                                                                                                                                                                                                                                                                                                                    |
| Quantitative variables       | 11      | Explain how quantitative variables were handled in the analyses. If applicable, describe which groupings were chosen and why <b>Pgs. 5-6.</b>                                                                                                                                                                                                                                                                                                                                                                                                                                                                                                                                                                                                                 |
| Statistical methods          | 12      | (a) Describe all statistical methods, including those used to control for confounding <b>Pgs. 6-7</b><br>(b) Describe any methods used to examine subgroups and interactions <b>N/A</b><br>(c) Explain how missing data were addressed <b>Pg. 9 and Online Supplement</b><br>(d) <i>Cohort study</i> —If applicable, explain how loss to follow-up was addressed<br><i>Case-control study</i> —If applicable, explain how matching of cases and controls was addressed<br><i>Cross-sectional study</i> —If applicable, describe analytical methods taking account of sampling strategy<br>(e) Describe any sensitivity analyses <b>N/A</b>                                                                                                                    |

Continued on next page

**Results**

|                  |     |                                                                                                                                                                                                                                                                                                                                                                                                                                                                                                                |
|------------------|-----|----------------------------------------------------------------------------------------------------------------------------------------------------------------------------------------------------------------------------------------------------------------------------------------------------------------------------------------------------------------------------------------------------------------------------------------------------------------------------------------------------------------|
| Participants     | 13* | (a) Report numbers of individuals at each stage of study—eg numbers potentially eligible, examined for eligibility, confirmed eligible, included in the study, completing follow-up, and analysed <a href="#">Table 1 and 3</a><br>(b) Give reasons for non-participation at each stage <a href="#">Pg. 4</a><br>(c) Consider use of a flow diagram <a href="#">N/A</a>                                                                                                                                        |
| Descriptive data | 14* | (a) Give characteristics of study participants (eg demographic, clinical, social) and information on exposures and potential confounders <a href="#">Table 1 and 2</a><br>(b) Indicate number of participants with missing data for each variable of interest <a href="#">N/A</a><br>(c) <i>Cohort study</i> —Summarise follow-up time (eg, average and total amount) <a href="#">Pg. 4</a>                                                                                                                    |
| Outcome data     | 15* | <i>Cohort study</i> —Report numbers of outcome events or summary measures over time <a href="#">Tables 2 and 3</a><br><i>Case-control study</i> —Report numbers in each exposure category, or summary measures of exposure<br><i>Cross-sectional study</i> —Report numbers of outcome events or summary measures                                                                                                                                                                                               |
| Main results     | 16  | (a) Give unadjusted estimates and, if applicable, confounder-adjusted estimates and their precision (eg, 95% confidence interval). Make clear which confounders were adjusted for and why they were included <a href="#">Abstract (pg. 2), Table 3 and Figure 2</a><br>(b) Report category boundaries when continuous variables were categorized <a href="#">Pg. 6</a><br>(c) If relevant, consider translating estimates of relative risk into absolute risk for a meaningful time period <a href="#">N/A</a> |
| Other analyses   | 17  | Report other analyses done—eg analyses of subgroups and interactions, and sensitivity analyses <a href="#">N/A</a>                                                                                                                                                                                                                                                                                                                                                                                             |

**Discussion**

|                  |    |                                                                                                                                                                                                     |
|------------------|----|-----------------------------------------------------------------------------------------------------------------------------------------------------------------------------------------------------|
| Key results      | 18 | Summarise key results with reference to study objectives <a href="#">Pgs. 7-8</a>                                                                                                                   |
| Limitations      | 19 | Discuss limitations of the study, taking into account sources of potential bias or imprecision. Discuss both direction and magnitude of any potential bias <a href="#">Pgs. 8-9</a>                 |
| Interpretation   | 20 | Give a cautious overall interpretation of results considering objectives, limitations, multiplicity of analyses, results from similar studies, and other relevant evidence <a href="#">Pgs. 7-9</a> |
| Generalisability | 21 | Discuss the generalisability (external validity) of the study results <a href="#">Pg. 9</a>                                                                                                         |

**Other information**

|         |    |                                                                                                                                                               |
|---------|----|---------------------------------------------------------------------------------------------------------------------------------------------------------------|
| Funding | 22 | Give the source of funding and the role of the funders for the present study and, if applicable, for the original study on which the present article is based |
|---------|----|---------------------------------------------------------------------------------------------------------------------------------------------------------------|

\*Give information separately for cases and controls in case-control studies and, if applicable, for exposed and unexposed groups in cohort and cross-sectional studies.

**Note:** An Explanation and Elaboration article discusses each checklist item and gives methodological background and published examples of transparent reporting. The STROBE checklist is best used in conjunction with this article (freely available on the Web sites of PLoS Medicine at <http://www.plosmedicine.org/>, Annals of Internal Medicine at <http://www.annals.org/>, and Epidemiology at <http://www.epidem.com/>). Information on the STROBE Initiative is available at [www.strobe-statement.org](http://www.strobe-statement.org).
