# Supplementary material for: Breastfeeding and behavioural problems: Propensity score matching with a national cohort of infants in Chile
Source: PubMed Central journal article supplement — BMJ Open. 2019 Feb 15;9(2):e025058. doi: 10.1136/bmjopen-2018-025058 (PMC6398902; doi:10.1136/bmjopen-2018-025058), 2019-02-15
Supplement: bmjopen-2018-025058supp001.pdf [file bmjopen-2018-025058supp001.pdf]

Online Supplement 1

*Family, maternal, infant, and medical characteristics: A comparison between the Entire and Included Cohort*

|                                            | <b>Entire Cohort<br/>N = 14,161 (%)</b> | <b>Included Families<br/>N = 3,933 (%)</b> | <b><i>p</i></b> |
|--------------------------------------------|-----------------------------------------|--------------------------------------------|-----------------|
| Resident spouse/partner (yes)              | 6,873 (69.2%)                           | 2,691 (68.4%)                              | <i>ns</i>       |
| Social class                               |                                         |                                            | ≤ .001          |
| Professional/managerial                    | 968 (9.7%)                              | 333 (8.5%)                                 |                 |
| Non-manual/skilled manual                  | 3,812 (38.4%)                           | 1,404 (35.7%)                              |                 |
| Semi-skilled/unskilled                     | 374 (3.8%)                              | 95 (2.4%)                                  |                 |
| Never worked                               | 4,779 (48.1%)                           | 2,101 (53.4%)                              |                 |
| Health provisional system                  |                                         |                                            | <i>ns</i>       |
| Public system                              | 8,820 (88.8%)                           | 3,508 (89.2%)                              |                 |
| Private system                             | 1,113 (11.2%)                           | 425 (10.8%)                                |                 |
| Maternal education                         |                                         |                                            | <i>ns</i>       |
| No formal education                        | 37 (0.4%)                               | 14 (0.4%)                                  |                 |
| Primary complete                           | 1,743 (17.7%)                           | 614 (15.7%)                                |                 |
| Secondary Complete                         | 3,917 (39.8%)                           | 1,577 (40.4%)                              |                 |
| Vocational training                        | 2,984 (30.3%)                           | 1,222 (31.3%)                              |                 |
| University training                        | 1,075 (10.9%)                           | 438 (11.2%)                                |                 |
| Postgraduate studies                       | 81 (0.8%)                               | 37 (0.9%)                                  |                 |
| Maternal working status (yes)              | 4,366 (44.0%)                           | 1,496 (38.0%)                              | ≤ .001          |
| Maternal age                               |                                         |                                            | ≤ .001          |
| ≤ 24                                       | 2,806 (28.2%)                           | 1,500 (38.1%)                              |                 |
| 25-29                                      | 2,250 (22.7%)                           | 884 (22.5%)                                |                 |
| 30-34                                      | 2,173 (21.9%)                           | 815 (20.7%)                                |                 |
| ≥ 35                                       | 2,704 (27.2%)                           | 734 (18.7%)                                |                 |
| Maternal depression during pregnancy (yes) | 1,027 (10.3%)                           | 574 (14.6%)                                | ≤ .001          |
| Smoking during pregnancy (yes)             | 978 (9.9%)                              | 412 (10.5%)                                | <i>ns</i>       |
| Alcohol use during pregnancy (yes)         | 705 (7.1%)                              | 283 (7.2%)                                 | <i>ns</i>       |
| Drug use during pregnancy (yes)            | 81 (0.8%)                               | 29 (0.7%)                                  | <i>ns</i>       |
| Delivery mode (caesarean)                  | 4,314 (43.5%)                           | 1,759 (44.7%)                              | <i>ns</i>       |
| Birth weight (≥ 2500g, yes)                | 205 (2.3%)                              | 103 (2.6%)                                 | <i>ns</i>       |
| Stay in incubator (yes)                    | 433 (4.4%)                              | 151 (3.8%)                                 | <i>ns</i>       |
| Infant sex (boy)                           | 5,004 (50.4%)                           | 1,992 (50.6%)                              | <i>ns</i>       |
